1 Lessening of porcine epidemic diarrhoea virus susceptibility in piglets after editing  
2 of the CMP-N-glycolylneuraminic acid hydroxylase gene with CRISPR/Cas9 to  
3 nullify N-glycolylneuraminic acid expression

4

5 Short title: Gene-edited CMAH Mutant Piglets Display Decreased Porcine Epidemic Diarrhoea  
6 Susceptibility

7

8 Ching-Fu Tu<sup>1,\*</sup>, Chin-kai Chuang<sup>1,#</sup>, Kai-Hsuan Hsiao<sup>1,5,#</sup>, Chien-Hong Chen<sup>1,6,#</sup>, Chie-Min Chen<sup>2</sup>, Su-Hei  
9 Peng<sup>1</sup>, Yu-Hsiu Su<sup>1</sup>, Ming-Tang Chiou<sup>3</sup>, Chon-Ho Yen<sup>1</sup>, Shau-Wen Hung<sup>4</sup>, Tien.-Shuh. Yang<sup>1,7</sup>, and  
10 Chuan-Mu Chen<sup>5, 8</sup>

11

12 Affiliations

13 <sup>1</sup> Division of Animal Technology, Animal Technology Laboratories, Agricultural Technology  
14 Research Institute, No.1, Ln. 51, Dahu Rd., Xiangshan Dist., Hsinchu City 30093, Taiwan,  
15 R.O.C.

16 <sup>2</sup> Chao Kun Biotech Ltd. No.22, Lane 156, Tai-Yuan Rd., Taipei 103, Taiwan, R.O.C.

17 <sup>3</sup> Department of Veterinary Medicine, College of Veterinary Medicine, National of Science and  
18 Technology, Pingtung, Taiwan, ROC.

19 <sup>4</sup>Division of Animal Resources, Animal Technology Laboratories, Agricultural Technology  
20 Research Institute, No.1, Ln. 51, Dahu Rd., Xiangshan Dist., Hsinchu City 30093, Taiwan,  
21 R.O.C.

22 <sup>5</sup>Department of Life Sciences, National Chung Hsing University, No.145, Xingda Rd., South  
23 Dist., Taichung City 402, Taiwan, R.O.C.

24 <sup>6</sup>Reproductive Medicine Center, Lee Women's Hospital, Taichung City, Taiwan,  
25 *R.O.C.*

26 <sup>7</sup>Department of Biotechnology and Animal Science, National Ilan University, No.1, Sec. 1,  
27 Shennong Rd., Yilan City, Yilan County 26047 O.C., Taiwan, R.O.C.

28 <sup>8</sup>The iEGG and Animal Biotechnology Center, National Chung Hsinh University, Taichung 402,  
29 Taiwan, R.O.C.

30 \*Corresponding author: [cftu@mail.atri.org.tw](mailto:cftu@mail.atri.org.tw)

31 # Contribution equally.

32

## 34 **Abstract**

35 Porcine epidemic diarrhoea virus (PEDV) devastates the health of piglets but may not  
36 infect piglets whose CMP-N-glycolylneuraminic acid hydroxylase (CMAH) gene mutated  
37 (knockouts, KO) by using CRISPR/Cas9 gene editing techniques. This hypothesis was tested by  
38 using KO piglets challenged with PEDV. Two single-guide RNAs targeting the CMAH gene and  
39 Cas9 mRNA were microinjected into the cytoplasm of newly fertilized eggs; 4 live founders  
40 generated and proven to be biallelic KO, lacking detectable N-glycolylneuraminic acid (NGNA).  
41 The founders were bred, and homozygous offspring were obtained. Two-day-old (in exps. I and  
42 III) and 3-day-old (in exp. II) KO and wild-type (WT) piglets were inoculated with TCID<sub>50</sub> 1x10<sup>3</sup>  
43 PEDV and then fed 20 mL of infant formula (in exps. I and II) or sow's colostrum (in exp. III)  
44 every 4 hours. In exp. III, the colostrum was offered 6 times and was then replaced with Ringer/5%  
45 glucose solution. At 72 hours post-PEDV inoculation (hpi), the animals were euthanized for  
46 necropsy, and their intestines were sampled. In all 3 experiments, the piglets showed apparent  
47 outward clinical manifestations suggesting that infection occurred despite the CMAH KO. In exp.  
48 I, all 6 WT piglets and only 1 of 6 KO piglets died at 72 hpi. Histopathology and  
49 immunofluorescence staining showed that the villus epithelial cells of WT piglets were severely  
50 exfoliated, but only moderate exfoliation and enterocyte vacuolization was observed in KO piglets.  
51 In exp. II, delayed clinical symptoms appeared, yet the immunofluorescence  
52 staining/histopathologic inspection (I/H) scores of the two groups differed little. In exp. III, the  
53 animals exhibited clinical and pathological signs after inoculation similar to those in exp. II. These

- 54 results suggest that porcine CMAH KO with nullified NGNA expression are not immune to PEDV
- 55 but that this KO may lessen the severity of the infection and delay its occurrence.

## 57 **Author summary**

58           The infection of villus epithelial cells by PEDV has been suggested to occur via putative  
59 sialic acid and aminopeptidase N (APN) receptors. Thus, CMP-N-glycolylneuraminic acid  
60 hydroxylase (CMAH) gene-mutated pigs that lack N-glycolylneuraminic acid (NGNA) receptors  
61 should exhibit resistance to PEDV infection even when APN, which is also responsible for peptide  
62 digestion and amino acid absorption and should not be tackled and remains intact. This hypothesis  
63 was tested in the present study by generating animals of this type; however, after PEDV challenge,  
64 they still showed clinical manifestations of infection. Although the hypothesis could not be verified  
65 by the results of the study, some of the immunological and histopathological evidence obtained  
66 suggested that this genetic alteration may lessen the severity of infection and delay its occurrence.  
67 The results also suggested that binding to NGNA is not a sufficient and necessary condition for  
68 PEDV infection of enterocytes. The null expression of CMAH by gene editing induced  
69 insignificant resistance to PEDV infection in neonatal piglets.

## 71 **Introduction**

72 Porcine epidemic diarrhoea (PED) was first recognized as an enteric disease in 1971 by the  
73 British veterinarian Oldham [*cf.* 1]; subsequently, the PED virus (PEDV) was isolated by Pensaert  
74 and de Bouck [2] at Ghent University in Belgium. Since then, PEDV-associated diarrhoea has  
75 been widely detected in Europe. In Asia, it was reported in 1982 [3], and it has subsequently greatly  
76 impacted the Asian pork industry. In China during 2010 and 2011, over one million nursing piglets  
77 were lost due to PEDV-associated diarrhoea [4]; in 2013, PEDV emerged in Korea and the USA  
78 [5-7] as well as in Taiwan [8], causing great economic losses and continuing to spread as an  
79 epidemic.

80 PEDV and transmissible gastroenteritis virus (TGEV) are members of the *Coronaviridae*  
81 family and the alpha coronavirus group. The PEDV genome consists of a positive single-stranded  
82 RNA approximately 28 kb in length that contains 7 open reading frames (ORF), including ORF1a,  
83 ORF1b, and ORF2-6 [9]. The viral particles are coated with S-protein, a type I membrane protein;  
84 it forms spikes on the viral surface that are used to infect host cells and also bears highly antigenic  
85 domains and could theoretically be used to develop a high-titre neutralizing PEDV vaccine [6, 10].  
86 However, Sun et al. [11] found that the sequence of this region is highly variable, a characteristic  
87 that is likely to reduce the efficiency of conventional commercial vaccines. Furthermore, the S-  
88 protein is a glycoprotein that undergoes complicated post-translational modifications that result in  
89 antigen diversity and create obstacles to the development of a PEDV vaccine [10].

90           The pathway of PEDV infection occurs mainly through the S-protein. PEDV first contacts  
91   sialic acids (neuraminic acid, NA) in host intestine [12] and then infects the villi by binding to  
92   aminopeptidase N (APN) on epithelial cells [13, 14]. These findings suggest that NA is the first  
93   glycoprotein receptor and that APN is the second receptor for PEDV during infection of the host  
94   intestine [15]. A similar process occurs during infection by transmissible gastroenteritis virus  
95   (TGEV) [12]; on the other hand, porcine respiratory coronavirus (PRCV) loses its ability to infect  
96   the host intestine due to mutation and deletion of the S-protein genomic region occur [16]. Since  
97   viral genomic sequences of S-protein are generally variable and unstable, but in mammals, e.g.,  
98   pigs, the codon sequences of their receptor are more stable and allow to be manipulated specifically  
99   by GE. As mentioned above, PEDV infects the host via NA and APN, and NA has been shown to  
100   play an important role in host immune function and infection by pathogens [17, 18]. Human cells  
101   are able to synthesize N-acetylINA (NANA) but not N-glycolylINA (NGNA) [19] because the  
102   human CMP-N-glycolylneuraminic acid hydroxylase (CMAH) gene has mutated during 2.5-3  
103   million years of evolution [17]. We suggest that, analogous to the way in which human evolution  
104   has eliminated the NGNA receptor for PEDV, the CMAH gene of domestic pigs might be  
105   artificially mutated by gene editing technology to produce resistance to PEDV infection. The APN  
106   gene is not proposed as a target because it is essential for dipeptide digestion and amino acid  
107   absorption.

108           Currently available technologies for gene editing (GE) include the use of ZFN (zinc finger  
109   nuclease) [20], TALEN (transcription activator-like effector nuclease) [21], and CRISPR

110 (clustered regularly interspaced short palindromic repeat)/Cas9 (CRISPR-associated (Cas)  
111 endoribonuclease 9) [22]. Due to the availability of convenient techniques for constructing and  
112 editing vectors and the fact that Cas9 is a universal enzyme that can be constructed separately to  
113 guide/target vectors, use of the CRISPR/Cas9 system for GE is currently more popular than use of  
114 the ZFN and TALEN systems. Furthermore, GE can be simultaneously conducted on multiple sites  
115 or genes with the same Cas9 to achieve different targeting purposes or reduce the risks of off-  
116 targeting [23-25]. We have established TALEN [26] and CRISPR/Cas9 [27, 28] systems for direct  
117 microinjection of GE vectors to generate GGTA1 mutant pigs. In this study, direct microinjection  
118 of two single-guide RNA and Cas9 mRNA vectors into the cytoplasm of pronuclear porcine  
119 embryos was used to generate CMAH mutant pigs with null expression of NGNA, and the  
120 possibility of obtaining mutant piglets that are resistant to infection by PEDV was examined.

121

## 122 **Results**

123

### 124 **Generation of CMAH mutant pigs**

125 A total of 67 embryos were microinjected with the CRISPR RNA, including two  
126 sgRNA which are directed against two sites on CMAH within exon2 and intron 2 (Fig 1A), and  
127 Cas9 mRNA and transferred to 3 foster dams. Five live piglets and 1 stillborn piglet were delivered  
128 by one pregnant sow (Table 1). PCR analysis revealed that 1 male (L667-02) and 3 females (L667-  
129 10, -11, and -12) (Fig 1C) carried 161-bp deletion mutations (Fig 1B). Further analysis by PCR-



130 directive sequencing (PDS) and subcloning of PCR products in T-A cloning vectors and  
131 sequencing (PTS) showed that the 4 live piglets and the stillborn piglet were biallelic CMAH  
132 mutants; of these, L667-02 was biallelic 161-bp deleted (D/D type) (Fig 2A), L667-10, -11 and -  
133 12 were mosaic with D/D type and 2 sites mutated (D/D and D/M types) (Fig 2A-C), and the  
134 stillborn animal (L667-D) had a single base mutation, a 5-bp insertion at site I and a 5-bp deletion  
135 at site II (M/M type) (Fig 2B and C). The mutational status of their offspring (Table 2) was  
136 confirmed by PCR, PDS and PTS (S1-S3 Figs). The animals used for PEDV challenge were  
137 obtained by breeding the three founders with the founder boar. All piglets were rapidly screened  
138 by PCR, and D/D piglets were preferentially used in the experiments. In exps. II and III, the D/D  
139 piglets were supplemented with 1 and 3 D/M type piglets, respectively (Table 3) that were  
140 confirmed by PTS to have 1-bp insertions or 14- or 2-bp deletions at site I on the mutated  
141 chromosome (S1-S3 Figs). The null expression of the CMAH gene was analysed based on the  
142 detection of NGNA/NANA by HPLC; the results showed that all founders (Fig 3) and their  
143 offspring (Fig S4) lacked NGNA expression. These results show that all founders and their  
144 offspring are biallelic mutants that fail to express CMAH and produce no NGNA in their tissues.

145

146 **Fig 1. Generation of CMAH Gene-Edited Pigs.** A. The porcine CMAH gene editing sites were  
147 designated on exon 2 (sense strand, red capital letters underlined in red) and intron 2 (antisense  
148 strand, red letters underlined in red). The sequences underlined in black are PCR primers. The  
149 sequences shown in large capital letters with yellow shading are exon 2. The blue arrows indicate

150 the gene editing sites. B. CMAH KO piglets were analysed and screened by PCR. C. Four lines of  
151 CMAH gene-edited piglets (1 male and 3 females) were obtained.

152

153 **Fig 2. Genotyping by TA-Cloning and Sequencing of the Porcine CMAH Gene Edited by**  
154 **CRISPR/Cas9 Vectors Directed Against Two Sites.** A. The genotype shown displays two  
155 simultaneously mutated sites and a deleted 161-bp DNA fragment; the blue A represents an extra  
156 inserted base that appeared in L667-12. B. The indel occurred at site I of exon II of the CMAH  
157 gene. C. Details of the mutation at site II of intron 2 of the CMAH gene. The blue letters represent  
158 inserted bases, and the dashed line indicates deleted bases.

159

160 **Fig 3. Expression of NGNA/NANA in the Tissues of CRISPR/Cas9 CMAH Mutant Founders.**  
161 L667-02, -10, -11 and -12 and their wild-type littermate (L667-01) were analysed by HPLC.  
162 NGNA STD and NANA STD are standard samples of NGNA and NANA, respectively. The line  
163 indicates a retention time of 10 min.

164

165

166 **Table 1. Generation of CMAH Knockout (KO) Pigs by Direct Microinjection of sgRNA/Cas**  
167 **9 mRNA into the Cytoplasm of Pronuclear Newly Fertilized Porcine Eggs.**

| Micromanipulation |             | Surrogate dam |              | No. of piglets    |          |                      |
|-------------------|-------------|---------------|--------------|-------------------|----------|----------------------|
| Exp.              | No. Embryos | E.T.          | Pregnant (%) | Born <sup>a</sup> | KO (%)   | BKO <sup>b</sup> (%) |
| 1                 | 31          | 1             | 1            | 5/1               | 5 (83.3) | 5 (83.3)             |
| 2                 | 21          | 1             | 0            | 0/0               | 0 (0)    | 0 (0)                |
|                   | 18          | 1             | 0            | 0/0               | 0 (0)    | 0 (0)                |
| Total             | 67          | 3             | 1 (33.3)     | 5/1               | 5 (83.3) | 5 (83.3)             |

168 <sup>a</sup>. alive/dead

169 <sup>b</sup>. biallelic knockout

170

171 **Table 2. Germline Transmission and Genotypes of F1 CMAH KO Piglets.**

| Sow     | Parity | Litter size | m/f/d(n) <sup>a</sup> | Birth weight (Mean±SE), kg | No. of piglets of KO genotype <sup>b</sup> |              |          |
|---------|--------|-------------|-----------------------|----------------------------|--------------------------------------------|--------------|----------|
|         |        |             |                       |                            | D/D (-161/+1/-5)                           | D/M (site I) |          |
|         |        |             |                       |                            |                                            |              | (-14 bp) |
| L667-10 | 1      | 12          | 5/5/2 (3)             | 1.43 ± 0.16                | 6 (5/1/0)                                  | 6            |          |
|         | 2      | 8           | 5/3/0 (0)             | 1.76 ± 0.08                | 7 (7/0/0)                                  | 1            |          |
|         | 3      | 12          | 3/6/3 (0)             | 1.53± 0.06                 | 9 (9/0/0)                                  | 3            |          |
|         |        |             |                       |                            |                                            |              | (+1 bp)  |
| L667-11 | 1      | 6           | 4/1/1 (0)             | 1.77 ± 0.05                | 4 (4/0/0)                                  | 2            |          |
|         | 2      | 6           | 4/2/0 (0)             | 1.76 ± 0.10                | 3 (3/0/0)                                  | 3            |          |
|         | 3      | 1           | 0/0/1 (0)             | 1.72                       | 1 (1/0/0)                                  | 0            |          |
|         |        |             |                       |                            |                                            |              | (-2 bp)  |
| L667-12 | 1      | 13          | 7/3/3 (3)             | 1.46 ± 0.10                | 13 (7/5/1)                                 | 0            |          |
|         | 2      | 13          | 8/4/1 (0)             | 1.57 ± 0.08                | 11 (6/3/2)                                 | 2            |          |
|         | 3      | 12          | 6/3/3 (0)             | 1.62 ± 0.07                | 10 (5/3/2)                                 | 2            |          |
| Sum     |        | 58          | 33/18/7 (6)           | 1.58 ± 0.04                | 17 11/5                                    | 8            |          |

172 a. No. of males/females/stillbirths (n= live piglets that died due to weakness)

173 b. Genotypes: D indicates deleted, I refers to the insertion type, and M indicates a site I mutation in  
 174 exon 2. D/D type: -161 indicates a genomic type featuring a 161-bp deletion in which the mutation  
 175 at sites I and II occurs simultaneously on both chromosomes; +1 indicates the indel with a 161-  
 176 bp deletion and a 1-bp insertion (+1); and -5 indicates the presence of a 161-bp deletion with  
 177 simultaneous deletion of 5 additional bp (-5 bp). D/M type: -161 bp/ site I mutated; in parentheses,  
 178 -14 bp indicates a 14-bp deletion, +1 bp indicates a 1-bp insertion, and -2 bp indicates a 2-bp  
 179 deletion.

180 **Table 3. Genotypes of the F1 CMAH KO Piglets Used for PEDV Challenge.**

| Exp.    | Sow/ L667- |     | Genotype    |     | Site I of<br>Mutant allele |     |
|---------|------------|-----|-------------|-----|----------------------------|-----|
|         | Parity     | ID. | Litter size | D/D |                            | D/M |
| 1       | 1          | 10  | 12          | 1   | 0                          | -   |
|         |            | 11  | 6           | 2   | 0                          | -   |
|         |            | 12  | 13          | 3   | 0                          | -   |
| Control |            | 12  |             | 1   | 0                          | -   |
| 2       | 2          | 10  | 8           | 3   | 0                          | -   |
|         |            | 11  | 6           | 3   | 1                          | +1  |
|         |            | 12  | 13          | 2   | 0                          | -   |
| Control |            | 12  |             | 1   | 0                          | -   |
| 3       | 3          | 10  | 12          | 4   | 2                          | -14 |
|         |            | 11  | 1           | 0   | 0                          | -   |
|         |            | 12  | 12          | 5   | 1                          | -2  |
| Control |            | 10  |             | 1   | 0                          | -   |

181 Note: Genotypes: D indicates that the mutation occurred at two sites simultaneously and resulted  
 182 in a 161-bp deletion, whereas M is site I-mutated; D/D refers to the case in which the 161-bp  
 183 deletion occurred on both chromosomes. The controls are wild-type piglets.

184 **Clinical observation of neonatal piglets challenged with nv-PEDV**

185 **Exp. I:** When neonatal 2-day-old piglets were challenged with nv-PEDV, both the CMAH  
186 mutant (Knockout, KO) and wild-type (WT) animals initially displayed clinical signs of vomiting  
187 and diarrhoea at 12 hours post-inoculation (hpi), and their activity also decreased (Table 4). In the  
188 WT group, the first piglet's death occurred at 44 hpi; a second animal died at 52 hpi, a third at 68  
189 hpi, and the remaining three animals were moribund and nearly dead at 72 hpi (Fig 4A). In the  
190 CMAH KO group, the first piglet died at 60 hpi, 3 piglets were moribund at 72 hpi, and the other  
191 remaining two piglets survived until the end of the trial (Fig 4A and Table 4). After nv-PEDV  
192 inoculation, the loss of body weight of WT piglets was  $0.69\pm 0.04$  kg, significantly ( $p<0.01$ ) greater  
193 than that of CMAH KO piglets ( $0.45\pm 0.03$  kg) (Fig 5A).

194

195

196 **Table 4. Clinical Signs Displayed by Neonatal Piglets after nv-PEDV Inoculation in Exps. I**  
 197 **and II.**

| Exp. | Geno-<br>type | No. | Hours post nv-PEDV inoculation |           |         |         |         |         |         |
|------|---------------|-----|--------------------------------|-----------|---------|---------|---------|---------|---------|
|      |               |     | 4-8                            | 12        | 24      | 36      | 48      | 60      | 72      |
| I    | KO            | 6   | 6A/                            | 6B/       | 6B/     | 1A5B/   | 6B/     | 4B1C1D/ | 2B3C1D/ |
|      |               |     | 6n                             | 2d4dv     | 3n3d    | 4n2d    | 3n3d    | 1n4d    | 5d      |
|      | WT            | 6   | 6A/                            | 6B/       | 2B4C/   | 4B1C1D/ | 4B1C1D/ | 1B3C2D/ | 3C3D/   |
|      |               |     | 6n                             | 6dv       | 2n4d    | 6d      | 2n2d1dv | 4d      | 3d      |
| II   | KO            | 9   | 9A/                            | 9A/       | 9B/     | 9B/     | 6B2C1D/ | 1B1C7D  | 9D/     |
|      |               |     | 9n                             | 2n1v2d4dv | 2n6d1dv | 9d      | 8d      | 2d      | 0       |
|      | WT            | 9   | 9A/                            | 9A/       | 9B/     | 9B/     | 5B2C2D/ | 2B7D/   | 1B1C7D/ |
|      |               |     | 9n                             | 4n3v1d1dv | 1n8d    | 1n8d    | 7d      | 2d      | 2d      |

198 \* No. of piglets with viability and clinical signs: viability - A is normal, B indicates decreased activity, C is  
 199 moribund, and D indicates dead; clinical signs - n indicates no clinical signs, d is diarrhoea, and v is vomiting.

200 **Fig 4. Survival of Neonatal Piglets After Oral Inoculation with nv-PEDV.** A, 2-day-old piglets;  
 201 B, 3-day-old neonatal piglets inoculated with PEDV. Solid circles (A) or squares (B) with lines  
 202 represent the CMAH KO piglets, and open diamonds (A) or squares (B) with dashed lines indicate  
 203 wild-type piglets. The arrow shows the time of inoculation. In A at 72 hpi, three moribund WT  
 204 piglets are classified as dead piglets.

205

206 **Fig 5. Body Weights of Neonatal Piglets Before and After Oral PEDV Inoculation.** A and B  
207 show 2-day-old piglets (n=6) and 3-day-old piglets (n=9), respectively. K0 and W0 represent KO  
208 and WT animals that were not inoculated with PEDV and were reared by their dams on the farm.  
209 KO and WT are knockout treated and wild-type treated animals, respectively.

210

211 **Exp. II:** The 3-day-old piglets were examined as in exp. I. Although both CMAH KO and  
212 WT animals initially showed clinical signs of vomiting and diarrhoea at 12 hpi, 2 KO and 4 WT  
213 piglets were without clinical signs (Table 4). Furthermore, all piglets sustained their activity until  
214 24 hpi (Table 4). In the WT group, the first death occurred at 40 hpi (Fig 4B); two piglets were  
215 lost at 48 hpi, 4 piglets died at 56 hpi, and the remaining two piglets were alive at the end of the  
216 trial. In the CMAH KO group, the first animal was lost at 44 hpi, and 3, 3, 1 and 1 piglets died at  
217 52, 56, 64 and 68 hpi, respectively (Fig 4B). There was no significant difference in the decrease in  
218 body weight in the two groups of piglets (WT/  $-0.60 \pm 0.02$  kg vs. CMAH KO/  $-0.55 \pm 0.04$  kg;  $p >$   
219  $0.05$ ) (Fig 5B).

220 **Exp. III:** To examine the early events and the role of NGNA in nv-PEDV infection of  
221 neonatal piglets, we used 2-day-old piglets challenged with nv-PEDV. After infection, the piglets  
222 were fed sows' milk and skim milk every 4 hours for 24 hours; this was then replaced by Ringer's  
223 lactate solution supplemented with 5% glucose, and the piglets were sacrificed at 24, 48 and 72  
224 hpi. The results (Table 5) show that until 12 hpi both the CMAH KO and WT piglets appeared  
225 normally active; however, with respect to clinical signs, only 3/11 CMAH KO piglets did not show



226 diarrhoea or vomiting at 12 hpi. From 4 to 24 hpi, all piglets were fed their own dams' whole or  
227 skim milk; the results show that all piglets displayed decreased activity and diarrhoea without a  
228 significant difference between CMAH KO and WT piglets. One moribund CMAH KO piglet was  
229 observed at 44 hpi, and one moribund WT piglet was observed at 56 hpi; all of the piglets stopped  
230 vomiting after 24 hpi. After the sow's milk was replaced with RLG, all piglets (both CMAH KO  
231 and WT) showed sustained activity and viability at least until 56 hpi, with the exception of one  
232 CMAH KO piglet that died prior to the end of the trial (Table 5).

233

234

235 **Table 5. Clinical Signs Displayed by Neonatal Piglets after nv-PEDV Inoculation in Exp. III.**

| Geno-<br>type | h  | No. | Hours post nv-PEDV inoculation |                |           |               |           |           |               |             |             |             |               |
|---------------|----|-----|--------------------------------|----------------|-----------|---------------|-----------|-----------|---------------|-------------|-------------|-------------|---------------|
|               |    |     | 4-8                            | 12             | 16        | 20            | 24        | 28-<br>40 | 44            | 48          | 56          | 64          | 72            |
| KO            | 24 | 3   | 3A/<br>3n                      | 3A/<br>2n1v    | 3B/<br>3d | 2B1C/<br>1v2d | 3B/<br>3d | -         | -             | -           | -           | -           | -             |
|               |    |     | 2A/<br>2n                      | 2A/<br>1n1v    | 2B/<br>2d | 2B/<br>1d1dv  | 2B/<br>2d | 2B/<br>2d | 1B1C/<br>1n1d | 2B/<br>1n1d | -           | -           | -             |
|               | 72 | 6   | 6A/<br>6n                      | 6A/<br>4v1d1dv | 6B/<br>6d | 6B/<br>6d     | 6B/<br>6d | 6B/<br>6d | 6B/<br>6d     | 6B/<br>6d   | 4B2C/<br>6d | 3B3C/<br>6d | 3B2C1D/<br>5d |
| WT            | 24 | 3   | 3A/<br>3n                      | 3A/<br>2v1dv   | 3B/<br>3d | 2B/<br>2d1dv  | 3B/<br>3d | -         | -             | -           | -           | -           | -             |
|               |    |     | 3A/<br>3n                      | 3A/<br>1v1d1dv | 3B/<br>3d | 3B/<br>3d     | 3B/<br>3d | 3B/<br>3d | 3B/<br>3d     | 3B/<br>3d   | -           | -           | -             |
|               | 72 | 6   | 6A/<br>6n                      | 6A/<br>2v4dv   | 6B/<br>6d | 6B/<br>6d     | 6B/<br>6d | 6B/<br>6d | 6B/<br>1n5d   | 6B/<br>6d   | 5B1C/<br>6d | 4B2C/<br>6d | 5B1C/<br>6d   |

236 \* No. of piglets with viability and clinical signs: viability - A is normal, B indicates decreased  
 237 ability, C is moribund, and D is dead; clinical signs - n indicates no clinical signs, d is  
 238 diarrhoea, and v is vomiting.

239 # One piglet died before experiment.

240

## 241 **Immuno/histopathology of neonatal piglets challenged with nv-PEDV**

242           After 72 hpi, all of the dead and euthanized piglets were necropsied, and their intestines  
243 were sampled for pathological examination. Grossly, the small intestine appeared transparent and  
244 orange-yellow to flesh pink in colour; it was thin-walled and dilated with fluid content in the live  
245 piglets (S5A-B Fig). In exp. I, the PEDV induced histopathologic changes, including enterocyte  
246 necrosis, degeneration, and exfoliation, and collapsed lamina proprial tissues containing  
247 karyorrhectic debris, were noted in all challenged piglets. However, these lesions varied from mild  
248 to severe, and the lesions were more severe in the moribund WT piglets than in the CMAH KO  
249 piglets (Fig 6). Immunofluorescence (IF) staining with a monoclonal antibody against PEDV  
250 nuclear protein was used to detect PEDV antigens. The results showed that PEDV antigen was  
251 presented in the epithelium covering the moderately atrophic tips of villi in the small intestine of  
252 WT and CMAH KO piglets (Fig 7). However, if the epithelial cells were defoliated from the villi  
253 after PEDV infection, no positive signals would be expected (Fig 7A). We further scored the  
254 severity of lesions in the intestines of the infected animals (Fig 8) by a combination of IF staining  
255 and histopathological inspection (immuno/histopathological, I/H, score). According to the I/H  
256 scores, there appeared to be no significant difference in the severity of the intestinal lesions in WT  
257 piglets (from  $3.4\pm 0.6$  to  $4.4\pm 0.3$ ) and those in CMAH KO piglets (from  $4.3\pm 0.4$  to  $4.7\pm 0.2$ ) in exp.  
258 II (Table 6). In exp. III, even ruling out the possible effects of feeding the animals commercial  
259 baby cow milk, we also found no significant difference in the I/H scores of WT and CMAH KO  
260 piglets (Table 7). According to the I/H scores obtained at 72 hpi, which ranged from  $3.8\pm 0.4$  to

261 3.2±0.5 in CMAH KO piglets and from 2.8±0.4 to 2.5±0.2 in WT piglets ( $p>0.05$ ), most piglets  
262 seemed to improve compared with those at 24 and 48 hpi when offered sow's milk and  
263 supplemental lactated Ringer's solution containing 5% glucose (Table 7).

264

265 **Fig 6. Pathological Inspection of Piglets' Intestine at the Middle Jejunum by H/E Staining.**

266 Panels A-1 and B1 and A-2 and B2 indicate wild-type and knockout piglets, respectively, after  
267 PEDV oral inoculation. The yellow bars indicate 200  $\mu\text{m}$ . The piglets from which these samples  
268 were obtained (KO2, KO4, KO5, WT2, WT5 and WT6) were moribund at 72 hpi.

269

270 **Fig 7. Immunofluorescence Staining with an Antibody against PEDV N Protein. WT3 (A)**

271 shows a sample from a wild-type piglet, and KO3 (B) shows a sample from a double-chromosome  
272 CMAH gene knockout piglet. The samples shown in the lower panel were stained with DAPI. The  
273 yellow bars indicate 200  $\mu\text{m}$ .

274

275 **Fig 8. Evaluation Criteria Based on Immunofluorescence Staining and Histopathological**

276 **Lesions (I/H score) of Piglets' Intestine Samples After PEDV Challenge. A. KO0 or WT0**

277 controls for the ground state, G0. B. IF is scored as G1 to G4 based on the relative intensity of  
278 staining, whereas G5 is based on villar atrophy or defoliation observed by H/E inspection. The  
279 corresponding scores are shown in C. The arrows indicate necrotic villi; the yellow bars represent

280 200  $\mu\text{m}$ .

281 **Table 6 Pathological Scoring of Piglet Small Intestine at 72 h after Oral Inoculation of 3-Day**  
282 **Old Neonates with PEDV.**

| Genotype | n | Jejunum |         | Ileum   |
|----------|---|---------|---------|---------|
|          |   | Front   | Middle  |         |
| KO       | 9 | 4.3±0.4 | 4.7±0.2 | 4.4±0.4 |
| WT       | 9 | 4.4±0.3 | 3.4±0.6 | 3.6±0.6 |

283 KO= CMAH KO homozygotes, WT= wild-type piglets.

284

285 **Table 7. Intensity of PEDV Infection of Epithelial Cells of Villi in CMAH KO Piglets'**  
286 **Intestines Revealed by Immunofluorescence Staining.**

| hpi <sup>1</sup> | Genotype <sup>2</sup> | No. of piglets | Jejunum |         | Ileum.  |
|------------------|-----------------------|----------------|---------|---------|---------|
|                  |                       |                | Front   | Middle  |         |
| 24               | KO                    | 3              | 5.0±0.0 | 5.0±0.0 | 3.3±0.9 |
|                  | WT                    | 3              | 3.0±1.0 | 4.0±0.6 | 3.7±0.9 |
| 48               | KO                    | 2              | 4.0±0.0 | 4.0±0.0 | 4.0±0.0 |
|                  | WT                    | 3              | 4.0±0.0 | 4.0±0.0 | 3.7±0.3 |
| 72               | KO                    | 6              | 3.2±0.5 | 3.8±0.4 | 3.3±0.6 |
|                  | WT                    | 6              | 2.5±0.2 | 2.8±0.4 | 2.5±0.3 |

287 1. hpi= hours post inoculation.

288 2. KO= CMAH gene knockout by gene editing; WT= wild-type piglets.

289

290

## 291 **Discussion**

292 Currently, gene editing is widely used in both basic and applied studies, e.g., in studies of

293 the disease resistance of farm animals. One convincing report showed that CD163 gene-edited pigs

294 generated by CRISPR/Cas9 exhibited physiological normality and showed little vulnerability to  
295 porcine reproductive and respiratory syndrome virus (PRRSV) infection either in vitro [29] or in  
296 vivo [30-32]. However, other attempts, including CD169 KO and CD163 KO, failed to produce  
297 evident resistance to PRRSV [33] or African swine fever [34], respectively. These failures may  
298 have occurred because the mechanism of viral infection involves other receptors or because it does  
299 not involve receptors [35].

300 We have established TALEN [26] and CRISPR/Cas9 [27, 28] gene editing techniques in  
301 which the editing plasmid vector is directly microinjected into the pronucleus of newly fertilized  
302 eggs and have used these techniques to generate GGTA1 mutant pigs for the study of  
303 xenotransplantation. In this study, two sgRNAs directed against exon II and intron 2 of the CMAH  
304 gene, together with Cas9 mRNA, were microinjected into the cytoplasm near the pronucleus; the  
305 microinjected eggs yielded 4 live pigs and one stillborn pig carrying a null function of the CMAH  
306 gene. Since CRISPR/Cas9 vectors make construction of the knockout vector very convenient and  
307 achieve very powerful mutation results, only 67 embryos were used for direct cytoplasmic  
308 microinjection, and 5 mutants were successfully generated. The efficiency was 7.5% based on the  
309 number of manipulated embryos and 83.3% based on the number of delivered piglets, all of which  
310 were biallelic mutants (Table 1). However, because the CRISPR/Cas9 vector might easily generate  
311 off-targeting mutants [23-25], we used two editing sites, simultaneously deleting a short DNA  
312 fragment and facilitating mutant screening by PCR. The results revealed that all the live founders  
313 carrying 161 bp deletion, especially L667-02, the sole male, was the biallelic D/D type. Burkard

314 et al. [29] used two sgRNA targeting sites to precisely delete exon 7 of CD163 to nullify domain  
315 5, which is required for binding PRRSV, without affecting the animals' normal immunology or  
316 physiology. According to animal breeding practices, it is easier to confirm the founder by PCR  
317 without a requirement for DNA sequencing; therefore, the D/D type will be used in future studies.  
318 The hypothesis that the absence of NGNA expression in CMAH KO piglets disables PEDV  
319 infection was partially proven in this study. In exp. I, 2-day-old old piglets were orally inoculated  
320 with the local outbreak strain nv-PEDV [36]. Although the final (72 hpi) survival rate differed  
321 little in the WT and KO animals, based on the histopathologic examination and considering the 3  
322 deadly moribund WT piglets (Table 4, Fig 4A), the CMAH KO piglets showed greater resistance  
323 to nv-PEDV infection than the WT animals. This assumption is supported by the high degree of  
324 histopathologic severity found in the WT piglets (WT2, WT5 and WT6), which clearly differed  
325 from that observed in the CMAH KO piglets (KO2, KO4 and KO5) (Fig 6). However, when 3-  
326 day-old piglets were used, no differences between CMAH KO and WT piglets were observed  
327 (Table 4, Fig 4B). It is doubtful that the NGNA present in cow's milk-based formula would enable  
328 the virus to infect the CMAH KO piglets. In exp. III, colostrum from the KO or WT sows was  
329 given to avoid any possible NGNA inference, yet the final susceptibilities of the two genotypes  
330 were similar. However, at least 3 of the 11 CMAH KO piglets showed normal activity and no  
331 clinical signs (no vomiting or diarrhoea) at 12 hpi, whereas the control piglets displayed vomiting  
332 and/or diarrhoea (Table 5). Lessened severity was therefore observed.



333           Considering that transmissible gastroenteritis virus (TGEV) and other coronaviruses use  
334 sialic acid (neuraminic acid, NA) as their first receptor [12, 15], PEDV might act in a similar  
335 manner. The major components of porcine mucin in the small intestinal submucosa are two types  
336 of NA, N-acetylneuraminic acid (NANA) and N-glycolylneuraminic acid (NGNA) (our  
337 unpublished data). Using a glycan screening array, Liu et al. [37] showed that Neu5Ac (or NANA)  
338 has the highest binding affinity for PEDV S1-NTD-CTD; however, they also found that porcine  
339 mucin or bovine mucin could inhibit or block in vitro PEDV and TGEV infection of PK-15 or  
340 Huh-7 cells transfected with porcine APN. The present results show that CMAH KO piglets  
341 exhibited delayed infection and minor symptoms after oral PEDV inoculation, suggesting that in  
342 CMAH KO piglets that are normally nursed, PEDV may be unable to bind efficiently to the APN  
343 on the villi of epithelial cells and pass through the intestinal lumen.

344           Fig 4A indicates that in exp. I six WT piglets (including 3 extremely moribund piglets) and  
345 one CMAH KO piglet died within 72 hpi. Mortality and weight loss (Fig 5A) showed significant  
346 differences ( $p<0.01$ ), although the initial body weights of the WT and KO piglets also differed  
347 ( $p<0.05$ ); however, the clinical outcome showed no relation to body weight. In general, the small  
348 intestines of the four KO piglets appeared normal (S5B Fig). H/E staining of the wild-type piglets  
349 showed that villus epithelial cells in the proximal and middle portions of the jejunum and ileum  
350 were severely defoliated except in the case of WT5 (Fig 6A-1 and B-1). In contrast, in the KO  
351 piglets, only KO6 (the dead piglet) showed epithelial cells severely defoliated from villi (Fig 6A-  
352 2 and B-2). However, these differences between CMAH KO and WT piglets were not observed

353 after PEDV inoculation in exps. II and III according to the I/H scores obtained at 24, 48 and 72  
354 hpi (Table 7). Actually, in exp. III at 24 hpi, we found that the I/H scores of CMAH KO ( $5.0 \pm$   
355  $0.0$ ) and WT ( $3.0 \pm 1.0$ ) were not significantly different ( $p = 0.12$ ).

356 It is known that PEDV causes severe enteric disease in suckling piglets [38, 39] and less  
357 severe disease in older weaned pigs [40]. Our results suggest that the differentiation might occur  
358 as early as in the neonatal period; clinical diarrhoea and/or vomiting and decreased activity were  
359 observed in all 2-day-old piglets but improved in 3-day-old piglets (Table 4). When caesarean-  
360 delivered and colostrum-deprived (CDCD) animals were used for oral inoculation of PEDV, the  
361 1-day-old piglets showed clinical signs at 12 hpi [41]; this was also observed in our study using  
362 naturally delivered piglets. Furthermore, in PEDV inoculation studies, 5-day-old CDCD piglets  
363 were more sensitive than 21-day-old weaned piglets [42]. Similarly, naturally delivered 9-day-old  
364 suckling piglets showed a weaker innate immune response to PEDV than weaned pigs [43]. This  
365 study used 2- or 3-day-old piglets that were naturally delivered and nursed with colostrum by  
366 CMAH KO or WT sows prior to PEDV oral inoculation in an attempt to realize the protective  
367 effects of nursing in animals in which the biallelic CMAH genes were mutated. In exp. III, the  
368 clinical symptoms of 2-day-old piglets that were PEDV inoculated and hand fed whole or skim  
369 sow's milk for an additional 24 h (Table 5) were similar to those of the 3-day-old piglets in exp.  
370 II (Table 4). Furthermore, when lactated Ringer's solution supplemented with 5% glucose was  
371 offered from 24 to 72 hpi, the epithelial cells of the villi showed less damage and/or showed  
372 increased recovery of epithelial cells from the crypts according to the I/H scores (Table 7), which

373 ranged from  $4.0 \pm 0.0$  to  $2.5 \pm 0.2$  in WT piglets and from  $5.0 \pm 0.0$  to  $3.2 \pm 0.5$  in the KO group.  
374 This benefit of oral rehydration therapy in acute viral diarrhoea could be attributed to glucose-  
375 facilitated sodium absorption [44]. Currently, the model may be improved by inoculating the  
376 piglets and allowed them to be continually nursed by dams of the same genotype to avoid NGNA  
377 interference.

378 In addition to their disease resistance, CMAH and GGTA1 KO animals are likely to display  
379 reduced hyperacute rejection of xenografts [45]. Our unpublished data also revealed that the  
380 acellular extracellular matrix derived from the intestine of CMAH KO pigs caused significantly  
381 less inflammation than that obtained from WT pigs after intramuscular implantation into  
382 CMAH/GGAT1 double KO pigs. Furthermore, NGNA present in red meat has been suggested to  
383 be a risk factor for human colorectal cancer and atherosclerosis in persons who habitually consume  
384 red meat [46]. Therefore, CMAH mutant pigs generated by GE can be viewed as pigs that offer a  
385 source of healthy red meat and of material that is suitable for use in biomedical devices.

386 In conclusion, the CMAH mutant pigs generated by gene editing could be a new breed with  
387 less susceptibility to PEDV, a source animal for medical materials and xenografts, and a source of  
388 healthy red meat.

389

390

391 **Materials and methods**

392

393 **Ethics statements**

394 All animals were managed and treated with permission from the Agricultural Technology  
395 Research Institute (IACUC104004). The use of the animals and the PEDV challenge protocol were  
396 approved by the IACUC committee of Agricultural Technology Research Institute  
397 (IACUC105063C1) and of National Pingtung University of Science and Technology (NPUST)  
398 (NPUST-105-060) under the regulation of the Animal Protection Act 1998.

399

400 **Animals and animal care**

401 Landrace mature gilts at least 120 to 150 kg in weight or sows and their neonatal piglets  
402 were used in this study. All animals were reared in a station free from specific pathogens (atrophic  
403 rhinitis, *Mycoplasma hyopneumoniae*, pseudorabies, *Actinobacillus pleuropneumoniae*, swine  
404 dysentery, scabies, classical swine fever, foot and mouth disease and porcine reproductive and  
405 respiratory syndrome). The gilts or sows were housed indoors on concrete floors, and the  
406 accommodation was artificially lit (450-600 lux for 9 hours a day) and exposed to window sun  
407 light. The animals were fed a restricted (4% body weight) commercial diet formulated to meet the  
408 requirements recommended by the National Research Council [47] and had *ad libitum* access to  
409 water.

410

## 411 **Treatment of donors and recipients**

412           The donors were synchronized and induced to super-ovulate by being fed a ration  
413 supplemented with Regumate® (containing 0.4% Altrenogest; Intervet, MSD, France) for 15 days  
414 to synchronize their oestrus cycles and then being intramuscularly injected with PMSG (1,750 IU)  
415 and hCG (1,500 IU), 78 h apart, to induce oocyte maturation and ovulation. After hCG injection,  
416 the animals were artificially inseminated and sacrificed 30 to 36 h or 54 to 56 h later, and fertilized  
417 eggs were harvested from their oviducts. The recipients were synchronized and ovulation-induced  
418 by the same methods except that a 12-h delay was used, the dosage of PMSG and hCG was reduced  
419 to 1,500 IU and 1,250 IU, respectively, and insemination did not occur. When the fertilized eggs  
420 arrived at a nearby laboratory, CRISPR/Cas9 RNA was microinjected into the cytoplasm; the eggs  
421 were then surgically transferred to the oviduct of a recipient from the end of the infundibulum by  
422 exposure of the uterine horn and oviducts within 3 to 4 h. The recipients were raised normally but  
423 treated with special care, particularly during farrowing.

## 424 **Pig embryo manipulation and microinjection**

425           The recovered newly fertilized eggs were centrifuged at 15,000xg for 10 to 15 min at 25°C  
426 to expose their pronuclei. The pronuclear embryos were added to a 20 µL microdroplet of D-PBS  
427 in a glass slide chamber and covered with mineral oil. The micro-manipulation was conducted  
428 under an inverted DIC (differential interference contrast) microscope at 200 to 300 x  
429 magnification. Each embryo was held in the proper position to reveal the pronucleus, and a mixture  
430 of single-guide RNA directed against two sites (sgRNA, 10 ng/µL each) and Cas9 RNA (70 ng/µL)

431 was microinjected into the cytoplasm near the pronucleus using a capillary needle with steady  
432 flow.

### 433 **Construction of CMAH gene-specific sgRNA knockout and Cas9 vectors**

434 In most genes, the 5'-end sequences usually encode the most important or the largest  
435 domains. The codon region of the porcine CAMH gene includes 14 exons; exon 1 contains 8 bp,  
436 and exon 2, which is 204 bp in length, is the largest exon (Fig 1A, large capital letters shaded in  
437 yellow). After verifying the sequences of exon 2 and introns 1 and 2 of the CMAH gene, we chose  
438 two GN<sub>19</sub>NGG Cas9 specific sequences; one of these has a sense strand site on exon 2, and the  
439 other has an antisense strand site located on intron 2 (Fig 1A, characters underlined in red).  
440 According to the sequences of the selected sites, two synthetic DNA primer pairs (shown in Table  
441 8) were annealed as double-stranded DNA fragments, digested with BsaI and cloned into the  
442 ppU6-(BsaI)<sub>2</sub>-sgRNA vector [48]; in this way, two sgRNAs, ppU6-(CMAH ex2)-sgRNA and  
443 ppU6-(CMAH in2)-sgRNA, were constructed. Cas9 in the pCX-Flag<sub>2</sub>-NLS1-Cas9-NL-S2 vector  
444 was constructed by Su et al. [48]. To make it possible to use the RNAs for gene editing, the U6  
445 transcription promoter of both CMAH ppU6-(CMAH ex2)-sgRNA and ppU6-(CMAH in2)-  
446 sgRNA was replaced by SP6, and CX in pCX-Flag<sub>2</sub>-NLS1-Cas9-NL-S2 was exchanged for the T7  
447 promoter. To prepare sgRNA and Cas9 RNA for use in microinjection of porcine fertilized eggs,  
448 the RNAs were subjected to in vitro transcription using the MEGAscript® T7 Transcription Kit  
449 (AM1334, Carlsbad, CA, USA) and purified using the MEGAclear™ Transcription Clean-Up Kit  
450 (AM1908, Carlsbad, CA, USA).

451

452 **Table 8. Primer Pairs Used To Construct sgRNA Expression Vectors.**

| Primer          | Sequence                                            |
|-----------------|-----------------------------------------------------|
| pCMAH exon 2F   | CGTC <u>GAAGCTGCCAATCTCAAGGA</u> GTTT TAGAGCTAGAAAT |
| pCMAH exon 2R   | TGCTATTTCTAGCTCTAAAAC <u>TCCTTGAGATTGGCAGCTTC</u>   |
| pCMAH intron 2F | CGTC <u>GATCGCCAGGGAGAAAGCAA</u> GTTT TAGAGCTAGAAAT |
| pCMAH intron 2R | TGCTATTTCTAGCTCTAAAAC <u>TTGCTTTCTCCCTGGCGATC</u>   |

453

454

#### 455 **Screening of CMAH gene mutant pigs**

456 Genomic DNA of all pigs delivered from foster dams or founders was isolated from tissue  
457 obtained from the piglet's tails and purified using a genomic DNA purification kit  
458 (Fermentas/Thermo). The CMAH mutant pigs were first screened by PCR using 0.1 µg of genomic  
459 DNA and 0.25 µM each of CMAH Ex2 F (TGG AGC TGT CAA TGC TCA GG) and CMAH  
460 Ex2 R (TCA GAG AGC TGC CGT AAA GG) primers annealed at 55°C. Wild-type or site-mutated  
461 pigs produced an ~439-bp amplicon, and biallelic simultaneously mutated animals displaying the  
462 161-bp deletion produced an ~278-bp amplicon. For further confirmation, all PCR products were  
463 verified by PCR product-direct sequencing (PDS) and PCR product/TA cloning/sequencing (PTS);  
464 from the latter, at least 6 colonies were picked and sequenced. DNA primer synthesis and DNA  
465 sequencing were conducted by Mission Biotech Ltd. (Taipei, Taiwan). The sequencing data were  
466 analysed using BioEdit software.

467

#### 468 **Analysis of NGNA/NANA by HPLC**

469           Samples of ear, tail and small intestine weighing approximately 100 mg were cut into small  
470 pieces in MQ water and incubated at 95°C for 30 min. After the samples had cooled to room  
471 temperature, 0.5 M H<sub>2</sub>SO<sub>4</sub> was added to a final concentration of 25 mM. The mixtures were  
472 incubated at 80°C for 1 h to release the sialic acids from the samples. After centrifugation, the  
473 supernatant was collected, an equal volume of DMB (1,2-diamino-4,5-methylenedioxybenzene,  
474 Sigma-Aldrich, Inc.) solution (1.6 mg DMB in 1 mL of 1.4 M acetic acid, 0.75 M 2-  
475 mercaptoethanol and 18 mM sodium hydrosulfite solution) was added, and the mixture was  
476 incubated at 80°C for 2 h to label the sialic acids. The labelled NGNA and NANA used as standards  
477 were prepared as 1 mg/mL solutions and reacted under the same labelling conditions. The DMB-  
478 labelled sample was injected onto a Waters™ HPLC system (Waters 2475 Multi-wavelength  
479 Fluorescence Detector, Waters 717 plus Autosampler and Waters 600 Controller) with the  
480 Discovery® BIO wide Pore C18 (5 µm, 4.6 x 25 cm) column. The analysis was performed using  
481 an isocratic mobile phase of methanol:acetonitrile:H<sub>2</sub>O (7:9:84) at a flow rate of 0.6 mL/min; the  
482 fluorescence detector was set at an excitation wavelength of 373 nm and an emission wavelength  
483 of 448 nm.

484

#### 485 **PEDV challenge**

486



487 **Piglet treatment and facility.** All CMAH KO neonatal piglets were delivered from three F0  
488 female founders that were served by the male F0 founder; thus, all founders were half or full sibs.  
489 All founders were biallelic CMAH mutants carrying a biallelic 161-bp deletion (D/D type) or one  
490 allele deleted and the other mutated (D/M type) genetic background. The D/D type and/or D/M  
491 type piglets were used as described in the experimental section. The control piglets were non-gene-  
492 edited piglets that were concurrently delivered from wild-type sows at the same farm.

493 PEDV challenge was conducted in a negatively air-conditioned animal facility at the  
494 NPUST. The pens were equipped with stainless mesh floors that allowed the faeces to drop down  
495 to a collection plate. The room temperature was set at 30°C, and each pen was equipped with two  
496 extra electric power bubs.

497 During 4 h shipping, the piglets were kept at 25°C in dark containers. When they arrived at  
498 the challenge room, the mutant and wild-type piglets were grouped and placed in different pens.  
499 Approximately one hour later, all piglets were oral inoculated with PEDV, which diluted in  
500 commercial baby milk powder that had been reconstituted with warm drinking water. In  
501 experiments I and II, the animals in each pen had free access to 200 mL of fresh prepared baby  
502 milk and clean tap water that was changed every 4 h. In exp. III, PEDV was diluted with KO or  
503 wild-type sow's milk obtained 2 days after parturition, and no milk was offered; instead, fresh  
504 drinking water was offered and changed every 4 hours. Other treatments were as described in  
505 experimental design III.

506

## 507 **Preparation of PEDV virus for Use in PEDV Challenge**

508           New variant-PEDV (nv-PEDV) was isolated from a field case that occurred at Jimei farm  
509 in Yunlin County in central Taiwan in February 2015. Almost all of the affected one-week-old  
510 piglets died of watery diarrhoea. The aetiology of the disease was confirmed to be a virulent strain  
511 of PEDV (it was thereafter designated the Jimei strain); the sequence of this strain is almost  
512 identical to that of the strain that caused the epidemic outbreak of PEDV in the US in 2014 [36].  
513 Although nv-PEDV can replicate in the Vero cell line, the nv-PEDV used in the challenge was  
514 prepared by oral inoculation of new born piglets that had not received colostrum to maintain its  
515 pathogenicity. The piglets were raised in a warm isolated chamber and were hand-fed fresh milk  
516 every six hours. Diarrhoea began to occur at 16-20 h after viral inoculation. The piglets were  
517 sacrificed 16-24 h after the observation of diarrhoea symptoms. The small intestinal content was  
518 collected by injection of 50 mL of DMEM supplemented with 10x P/S into the lumen followed by  
519 massage and extrusion from one end to the other end. The intestinal content was filtered through  
520 stainless mesh to clarify the content. Finally, the sample was centrifuged at 3000xg to precipitate  
521 all cellular debris, and the supernatant was collected and divided into 5-mL portions in sterile  
522 conical tubes. Three small fragments of intestine were subjected to paraffin-embedded tissue  
523 sectioning and IHC to confirm the presence of PEDV in intestinal epithelial cells (TGEV and  
524 rotavirus detection was also performed, and both tests were negative). A TCID<sub>50</sub> was used  
525 according to standard virological methods to determine the viral content of the Jimei PEDV virus  
526 preparation used in the challenge study. The virus was maintained at -80°C until the challenge

527 study was performed. Inoculation of the animals with PEDV was conducted as described by Jung  
528 et al. [7]. In brief,  $10^3$  TCID<sub>50</sub>/mL of frozen nv-PEDV stock was thawed at hand temperature, and  
529 10 mL of the thawed stock was mixed with 90 mL of reconstituted commercial baby milk or sow's  
530 milk by repeatedly inverting the container. The CMAH mutant and wild-type piglets were  
531 inoculated with  $10^3$  TCID<sub>50</sub>/10 mL PEDV orally by hand using a syringe.

532

### 533 **Experimental design**

534 **Exp. I: Challenge of 2-day-old neonatal piglets with nv-PEDV.** In total, 6 D/D type and  
535 6 wild-type piglets were used for PEDV challenge, and one D/D type and one wild-type piglet  
536 without virus treatment were used as controls; the latter were not housed with the infected piglets.  
537 All neonatal piglets were nursed for approximately 20 h to allow intake of colostrum and then  
538 delivered to a negatively air-conditioned facility.

539 **Exp. II: Challenge of 3-day-old neonatal piglets with nv-PEDV.** In this trial, 8 D/D and  
540 1 D/M type mutant piglets and 9 wild-type piglets were used for PEDV challenge, and one D/D  
541 mutant piglet and one wild-type piglet without virus treatment served as controls. All of the  
542 neonatal piglets were nursed for approximately 44 h to permit intake of colostrum and dam's milk.  
543 The detailed conditions of the PEDV challenge were the same as those used in experiment I.

544 **Exp. III: Challenge of 2-day-old neonatal piglets with nv-PEDV followed by extended**  
545 **feeding of sows' colostrum.** In this trial, 9 D/D and 3 D/M type mutant piglets and 12 wild-type  
546 piglets were used for PEDV challenge, and one D/D type piglet and one wild-type piglet without

547 virus treatment served as controls. All neonatal piglets were nursed for approximately 20 h to  
548 permit intake of colostrum and then delivered to a negatively air-conditioned facility. In this trial,  
549 the piglets were orally inoculated with PEDV as in experiment I and II and were not fed  
550 commercial baby cow milk; instead, they were fed their dams' or other founder's milk that had  
551 been collected within 20 h. From 4 to 24 h post PEDV inoculation (hpi), the piglets were fed 20  
552 mL of sow's milk by hand every 4 h; whole milk was fed at 4 and 8 hpi, and skim milk was fed  
553 from 12 to 24 hpi. From 24 hpi to 72 hpi, 20 mL of lactated Ringer's solution supplemented with  
554 5% glucose was fed to each piglet every 4 h. The piglets were randomly allocated to sacrifice at  
555 24 hpi (3 piglets), 48 hpi (3 piglets), or 72 hpi (6 piglets), and the small intestines were sampled.

556

### 557 **Clinical observations**

558 After inoculation with PEDV, the piglets' behaviour, including vomiting, diarrhoea, and  
559 lethargy, was observed and recorded every 4 hours for 3 days. When the piglets died or at the end  
560 of the experiment, their body weights were recorded, and they were necropsied on the same day.

561

### 562 **Sampling**

563 The intestines of all piglets were sampled at the upper and middle region of the jejunum  
564 and the upper part of the ileum by resecting a portion of the intestine approximately 10 cm in  
565 length. This piece was then ligated at both ends with surgical string, cut down, and a suitable

566 amount of 10% formalin was injected into the luminal space. The entire sample was then immersed  
567 in ~15 mL 10% formalin and fixed for at least for 24 hours.

568

### 569 **H/E and immunofluorescence (IF) staining**

570 After fixation, the samples of intestine obtained from the piglets were sliced, embedded in  
571 paraffin, and sectioned at 3 to 4  $\mu\text{m}$  thickness. The sections were placed on slides, de-waxed in  
572 xylene and sequentially treated with 100%, 95%, 80% and 70% ethanol; the slides were then  
573 stained by H/E. For IF staining, the slides were de-waxed in xylene and 100% ethanol and further  
574 heated in boiling TAE buffer for 3 min to activate the antigen. After cooling to room temperature,  
575 the slides were washed with PBS for 15 min, and the tissues were stained with a primary antibody  
576 against PEDV (prepared by Dr. CM Chen) and a commercial secondary antibody, FITC-  
577 conjugated goat anti-mouse immunoglobulin (Cappel). After immersion in DAPI solution, the  
578 slides were sealed with 10% glycerol, and the signals were observed on an Olympus BX50  
579 microscope (Olympus, Japan) enlighten by UV-light.

580

### 581 **Pathology evaluation**

582 The criteria used to score immunofluorescence (IF) staining and histopathological lesions  
583 (I/H score) associated with PEDV are shown in Fig 8. PEDV mainly infects the epithelial cells  
584 that form the mucosa of the small intestine. In the early stage of PEDV infection, only IF staining  
585 allows us to observe whether or not epithelial cells have been infected by PEDV. Therefore, at that

586 stage, the percentage of IF-positive cells was the only criterion used to determine the severity of  
587 PEDV infection. However, in the middle to late stages of infection, the severity of PEDV infection  
588 is better judged by the degree of villar atrophy because infected cells often defoliate from the  
589 mucosa and IF may not reveal the PEDV-infected cells. Therefore, the lesions were scored from 1  
590 to 5 as shown in Fig 8C; the scores combined the results of both IF staining and histopathological  
591 inspection in an I/H score that was used in the final statistical analysis.

592

### 593 **Statistical analysis**

594 All of the clinical and viability data were recorded and analysed using GraphPad Prism 6 (GraphPad  
595 Software, Inc.). The survival rate (curves) of the piglets after PEDV challenge was analysed using  
596 the Log-rank (Mantel-Cox) and Gehan-Breslow-Wilcoxon tests. The t-test was used to analyse the body  
597 weight and immune/histopathologic data obtained from the intestinal samples from all  
598 experimental piglets. The significance level (\*) was set at 0.05.

599

### 600 **Acknowledgements**

601 The authors would like to express their sincere thanks to Mr. Chi-Yun Hsu, Mr. Shau-  
602 Ching Hseu and Mr. Ci-Hong Wong for assistance with the care of the experimental animals,  
603 particularly that of the KO pigs. Thanks are also expressed to Ms. Ming-Shing Liu for technical  
604 assistance with pig surgery and embryo transfer and to Dr. Chao-Nan Lin for his assistance with  
605 the PEDV challenge trial at the National University of Science and Technology.



## 607 **References**

- 608 1. Lee C. Porcine epidemic diarrhea virus: an emerging and re-emerging epizootic swine  
609 virus. *Virology*. 2015;12: 193.
- 610 2. Pensaert MB, de Bouck P. A new coronavirus-like particle associated with diarrhea in  
611 swine. *Arch Virol*. 1978;58: 243-247.
- 612 3. Chae C, Kim O, Choi C, Min K, Cho WS, Kim J, et al. Prevalence of Porcine epidemic  
613 diarrhoea virus and transmissible gastroenteritis virus infection in Korean pigs. *Vet Rec*.  
614 2000;147: 606-608.
- 615 4. Sun RQ, Cai RJ, Chen YQ, Liang PS, Chen DK, Song CX. Outbreak of Porcine epidemic  
616 diarrhea in suckling piglets, China. *Emerg Infect Dis*. 2012;18: 161-163.
- 617 5. Lee S, Lee C. Outbreak-related Porcine epidemic diarrhea virus strains similar to US  
618 strains, South Korea, 2013. *Emerg Infect Dis*. 2014;20: 1223-1226.
- 619 6. Oh J, Lee KW, Choi HW, Lee C. Immunogenicity and protective efficacy of recombinant  
620 S1 domain of the Porcine epidemic diarrhea virus spike protein. *Arch Virol*. 2014;159:  
621 2977-2987.
- 622 7. Jung K, Wang Q, Scheuer KA, Lu Z, Zhang Y, Saif LJ. Pathology of US Porcine epidemic  
623 diarrhea virus strain PC21A in gnotobiotic pigs. *Emerg Infect Dis*. 2014;20: 662-665.
- 624 8. Lin CN, Chung WB, Chang SW, Wen CC, Liu H, Chien CH, et al. US-like strain of Porcine  
625 epidemic diarrhea virus outbreaks in Taiwan, 2013–2014. *J Vet Diagn Invest*. 2014;76:  
626 1297-1299.



- 627 9. Kocherhans R, Bridgen A, Ackermann M, Tobler K. Completion of the Porcine epidemic  
628 diarrhoea coronavirus (PEDV) genome sequence. *Virus Genes*. 2001;23: 137-144.
- 629 10. Song D, Moon H, Kang B. Porcine epidemic diarrhea: a review of current epidemiology  
630 and available vaccines. *Clin Exp Vaccine Res*. 2015; 4:166-176.
- 631 11. Sun R, Leng Z, Zhai S-L, Chen D, Song C. Genetic variability and phylogeny of current  
632 Chinese Porcine epidemic diarrhea virus strains based on spike, ORF3, and  
633 membranegenes. *Sci World J*. 2014;2014: 208439.
- 634 12. Schwegmann-Weßels C, Herrler G. Sialic acids as receptor determinants for coronaviruses.  
635 *Glycoconj J*. 2006;23: 51-58.
- 636 13. Li BX, Ge JW, Li YJ. Porcine aminopeptidase N is a functional receptor for the PEDV  
637 coronavirus. *Virology*. 2007;365: 166-172.
- 638 14. Cong Y, Li X, Bai Y, Lv X, Herrler G, Enjuanes L, et al. Porcine aminopeptidase N  
639 mediated polarized infection by Porcine epidemic diarrhea virus in target cells. *Virology*.  
640 2015;478: 1-8.
- 641 15. Deng F, Ye G, Liu Q, Navid M, Zhong X, Li Y, et al. Identification and comparison of  
642 receptor binding characteristics of the spike protein of two Porcine epidemic diarrhea virus  
643 strains. *Viruses*. 2016;8: 55.
- 644 16. Schultze B, Krempl C, Ballesteros ML, Shaw L, Schauer R, Enjuanes L, et al.  
645 Transmissible gastroenteritis coronavirus, but not the related porcine respiratory

- 646 coronavirus, has a sialic acid (N-glycolylneuraminic acid) binding activity. *J Virol.*  
647 1996;70: 5634-5637.
- 648 17. Varki A. Multiple changes in sialic acid biology during human evolution. *Glycoconj J.*  
649 2009;26: 231-245.
- 650 18. Varki A, Gagneux P. Multifarious roles of sialic acids in immunity. *Ann N Y Acad Sci.*  
651 2012;1253: 16-36.
- 652 19. Hayakawa T, Aki I, Varki A, Satta Y, Takahata N. Fixation of the human-specific CMP-  
653 N-acetylneuraminic acid hydroxylase pseudogene and implications of haplotype diversity  
654 for human evolution. *Genetics.* 2006;172: 1139-1146.
- 655 20. Moehle EA, Rock JM, Lee YL, Jouvenot Y, DeKolver RC, Gregory PD, et al. Targeted  
656 gene addition into a specified location in the human genome using designed zinc finger  
657 nucleases. *Proc Natl Acad Sci U S A.* 2007;104: 3055-3060.
- 658 21. Christian M, Cermak T, Doyle EL, Schmidt C, Zhang F, Hummel A, et al. Targeting DNA  
659 double-strand breaks with TAL effector nucleases. *Genetics.* 2010;186: 757-761.
- 660 22. Cong L, Ran FA, Cox D, Lin S, Barretto R, Habib N, et al. Multiplex genome engineering  
661 using CRISPR/Cas systems. *Science.* 2013;339: 819-823.
- 662 23. Fu Y, Foden JA, Khayter C, Maeder ML, Reyon D, Joung JK, et al. High-frequency off-  
663 target mutagenesis induced by CRISPR-Cas nucleases in human cells. *Nat Biotechnol.*  
664 2013;31: 822-826.

- 665 24. Shen B, Zhang W, Zhang J, Zhou J, Wang J, Chen L, et al. Efficient genome modification  
666 by CRISPR-Cas9 nickase with minimal off-target effects. *Nat Methods*. 2014;11: 399-402.
- 667 25. Wang H, Yang H, Shivalila CS, Dawlaty MM, Cheng AW, Zhang F, et al. One-step  
668 generation of mice carrying mutations in multiple genes by CRISPR/Cas-mediated genome  
669 engineering. *Cell*. 2013;153: 910-918.
- 670 26. Chuang Ck, Chen CH, Su YS, Peng SH, Lin TY, Huang CL, et al. Generation of GGTA1  
671 knockout pigs by using direct pronuclear microinjection with TALEN plasmid DNA  
672 vectors. *J Chin Anim Sci*. 2016;45: 223-240.  
673 (<https://www.csas.org.tw/online.php?page=2>)
- 674 27. Chuang CK, Chen CH, Huang CL, Su YH, Peng SH, Lin TY, et al. Generation of GGTA1  
675 mutant pigs by direct pronuclear microinjection of CRISPR/Cas9 plasmid vectors. *Anim*  
676 *Biotechnol*. 2017;28: 174-181.
- 677 28. Chuang CK, Tu CF, Chen CH. Generation of mutant pigs by direct pronuclear  
678 microinjection of CRISPR/Cas9 plasmid vectors. *Bio Protocol*. 2017;7. doi:  
679 10.21769/bioprotoc.2321.
- 680 29. Burkard C, Lillico SG, Reid E, Jackson B, Mileham AJ, Ait-Ali T, et al. Precision  
681 engineering for PRRSV resistance in pigs: macrophages from genome edited pigs lacking  
682 CD163 SRCR5 domain are fully resistant to both PRRSV genotypes while maintaining  
683 biological function. *PLoS Pathog*. 2017;13: e1006206.

- 684 30. Burkard C, Opriessnig T, Mileham AJ, Stadejek T, Ait-Ali T, Lilloco SG, et al. Pigs lacking  
685 the scavenger receptor cysteine-rich domain 5 of CD163 are resistant to porcine  
686 reproductive and respiratory syndrome virus 1 infection. *J Virol.* 2018;92. doi:  
687 10.1128/jvi.00415-18
- 688 31. Whitworth KM, Rowland RRR, Ewen CL, Tribble BR, Kerrigan MA, Cino-Ozuna AG, et  
689 al. Gene-edited pigs are protected from porcine reproductive and respiratory syndrome  
690 virus. *Nat Biotechnol.* 2016;34: 20-22.
- 691 32. Yang H, Zhang J, Zhang X, Shi J, Pan Y, Zhou R, et al. CD163 knockout pigs are fully  
692 resistant to highly pathogenic porcine reproductive and respiratory syndrome virus.  
693 *Antiviral Res.* 2018;151: 63-70.
- 694 33. Prather RS, Rowland RRR, Ewen C, Tribble B, Kerrigan M, Bawa B, et al. An intact  
695 sialoadhesin (Sn/SIGLEC1/CD169) is not required for attachment/internalization of the  
696 porcine reproductive and respiratory syndrome virus. *J Virol.* 2013;87: 9538-9546.
- 697 34. Popescu L, Gaudreault NN, Whitworth KM, Murgia MV, Nietfeld JC, Mileham A, et al.  
698 Genetically edited pigs lacking CD163 show no resistance following infection with the  
699 African swine fever virus isolate, Georgia 2007/1. *Virology.* 2017;501: 102-106.
- 700 35. Hernáez B, Guerra M, Salas ML, Andrés G. African swine fever virus undergoes outer  
701 envelope disruption, capsid disassembly and inner envelope fusion before core release  
702 from multivesicular endosomes. *PLoS Pathog.* 2016;12: e1005595.

- 703 36. Chen C. How to control PEDV in Taiwan. 2017; Available from  
704 [https://www.angrin.tlri.gov.tw/pig/meeting/2017MET/summary/2017PIC\\_4-3.pdf](https://www.angrin.tlri.gov.tw/pig/meeting/2017MET/summary/2017PIC_4-3.pdf)
- 705 37. Liu C, Tang J, Ma Y, Liang X, Yang Y, Peng G, et al. Receptor usage and cell entry of  
706 Porcine epidemic diarrhea coronavirus. *J Virol.* 2015;89: 6121-6125.
- 707 38. Chen Q, Li G, Stasko J, Thomas JT, Stensland WR, Pillatzki AE, et al. Isolation and  
708 characterization of Porcine epidemic diarrhea viruses associated with the 2013 disease  
709 outbreak among swine in the United States. *J Clin Microbiol.* 2014;52: 234-243.
- 710 39. Stevenson GW, Hoang H, Schwartz KJ, Burrough ER, Sun D, Madson D, et al. Emergence  
711 of Porcine epidemic diarrhea virus in the United States: clinical signs, lesions, and viral  
712 genomic sequences. *J Vet Diagn Invest.* 2013;25: 649-654.
- 713 40. Madson DM, Magstadt DR, Arruda PHE, Hoang H, Sun D, Bower LP, et al. Pathogenesis  
714 of Porcine epidemic diarrhea virus isolate (US/Iowa/18984/2013) in 3-week-old weaned  
715 pigs. *Vet Microbiol.* 2014;174: 60-68.
- 716 41. Madson DM, Arruda PHE, Magstadt DR, Burrough ER, Hoang H, Sun D, et al.  
717 Characterization of Porcine epidemic diarrhea virus Isolate US/Iowa/18984/2013 infection  
718 in 1-day-old cesarean-derived colostrum-deprived piglets. *Vet Pathol.* 2016;53: 44-52.
- 719 42. Thomas JT, Chen Q, Gauger PC, Giménez-Lirola LG, Sinha A, Harmon KM, et al. Effect  
720 of Porcine epidemic diarrhea virus infectious doses on infection outcomes in naïve  
721 conventional neonatal and weaned pigs. *PLoS One.* 2015;10: e0139266.

- 722 43. Annamalai T, Saif LJ, Lu Z, Jung K. Age-dependent variation in innate immune responses  
723 to Porcine epidemic diarrhea virus infection in suckling versus weaned pigs. *Vet Immunol*  
724 *Immunopathol.* 2015;168: 193-202.
- 725 44. Rhoads JM, MacLeod RJ, Hamilton JR. Alanine enhances jejunal sodium absorption in the  
726 presence of glucose studies in piglet viral diarrhea. *Pediatr Res.* 1986;20: 879-883.
- 727 45. Cooper DKC, Ekser B, Ramsoondar J, Phelps C, Ayares D. The role of genetically  
728 engineered pigs in xenotransplantation research. *J Pathol.* 2016;238: 288-299.
- 729 46. Alisson-Silva F, Kawanishi K, Varki A. Human risk of diseases associated with red meat  
730 intake: analysis of current theories and proposed role for metabolic incorporation of a non-  
731 human sialic acid. *Mol Aspects Med.* 2016;51: 16-30.
- 732 47. National Research Council. Nutrient requirements of swine. 11th ed. Washington, D.C.,  
733 USA.: National Academic Science Press, Engineering and Medicine; 2012.
- 734 48. Su YH, Lin TY, Huang CL, Tu CF, Chuang CK. Construction of a CRISPR-Cas9 system  
735 for pig genome targeting. *Anim Biotechnol.* 2015;26: 279-288.

736

737

## 738 **Supplementary Information**

739 **S1 Fig. Analysis of CMAH Gene-Edited Offspring from the First Parity.** A. The PCR products  
740 that revealed more than one band were further subcloned into the TA vector for colony purification  
741 and sequencing. B. Offspring with mutations at site I (exon II) and site II (intron 2). C. The  
742 offspring carrying two sites mutated simultaneously, with deletion of a 161-bp DNA fragment,  
743 and some of them showed further indel of +1 or -5 bp.

744 **S2 Fig. Analysis of CMAH Gene-Edited Offspring from the Second Parity.** A. The PCR  
745 products that revealed more than one band were further subcloned into the TA vector for colony  
746 purification and sequencing. B. Offspring with mutations at site I (exon II) and site II (intron 2).  
747 C. The offspring carrying two sites mutated simultaneously, with deletion of a 161-bp DNA  
748 fragment, and some of them showed further indel of +1 or -5 bp.

749 **S3 Fig. Analysis of CMAH Gene-Edited Offspring from the Third Parity.** A. The PCR  
750 products that revealed more than one band were further subcloned into the TA vector for colony  
751 purification and sequencing. B. Offspring with mutations at site I (exon II) and site II (intron 2).  
752 C. The offspring carrying two sites mutated simultaneously, with deletion of a 161-bp DNA  
753 fragment, and some of them showed further indel of +1 or -5 bp.

754 **S4 Fig. HPLC Analysis of NGNA/NANA in the Ear Tissues of Six F1 Offspring of the CMAH**  
755 **KO Founders.** The retention times of NGNA and NANA are shown as numbers on the peaks.

756 **S5 Fig. Gross Appearance of the Small Intestine of Neonatal Piglets at 72 hpi or at the Time**  
757 **of Death during the Trial.**



Fig. 1A.

ccagcaggta gccaccaagc ttggggactt ggagggaggg ctttcaaacg tattttcata  
aaaaagacct gtggagctgt caatgctcag ggattctctc ttaaaatcta acagtattaa  
tctgctaaaa catttgcctt ttcatagCAT CGAACAAACG ACGGAGATCC TGTTGTGCCT  
CTCACCTGCC GAAGCTGCCA ATCTCAAGGA AGGAATCAAT TTTGTTCGAA ATAAGAGCAC  
TGGCAAGGAT TACATCTTAT TTAAGAATAA GAGCCGCCTG AAGGCATGTA AGAACATGTG  
CAAGCACCAA GGAGGCCTCT TCATTAAAGA CATTGAGGAT CTAAATGGAA Ggtactgaga  
atcctttgct ttctccctgg cgatcccttc tccaattag gtttggcagg aatgtgctc  
attgagaaat tttaaatagat ccaatcaaca tgctatttcc cccagcacat gcctaacttt  
ttcttaagct cctttacggc agctctctga ttttgattta tgaccttgac ttaatttccc  
atcctctctg aagaactatt gtttaaaatg tattcctagt tgataaacag tgaaacttct



## Fig. 2A. Sites I/II mutation

Wild type 5' CTCACCTGCCGAAGCTGCCAATCTCAAGGAAGGAATCAATTTTGTTGAAATAAGAGCACTGGCAAGGATTACA

136 (-161 bp) 298

L 667-02-1 CTCACCTGCCGAAGCTGCCAATCTCAA-----CTTTCTCCCTGGCGATCCTTTCTCCCAATTAGGTTTGG

L 667-02-2 CTCACCTGCCGAAGCTGCCAATCTCAA-----CTTTCTCCCTGGCGATCCTTTCTCCCAATTAGGTTTGG

L 667-02-3 CTCACCTGCCGAAGCTGCCAATCTCAA-----CTTTCTCCCTGGCGATCCTTTCTCCCAATTAGGTTTGG

L 667-02-4 CTCACCTGCCGAAGCTGCCAATCTCAA-----CTTTCTCCCTGGCGATCCTTTCTCCCAATTAGGTTTGG

L 667-02-5 CTCACCTGCCGAAGCTGCCAATCTCAA-----CTTTCTCCCTGGCGATCCTTTCTCCCAATTAGGTTTGG

L 667-10-4 CTCACCTGCCGAAGCTGCCAATCTCAA-----CTTTCTCCCTGGCGATCCTTTCTCCCAATTAGGTTTGG

L 667-10-5 CTCACCTGCCGAAGCTGCCAATCTCAA-----CTTTCTCCCTGGCGATCCTTTCTCCCAATTAGGCTTGG

L 667-11-1 CTCACCTGCCGAAGCTGCCAATCTCAA-----CTTTCTCCCTGGCGATCCTTTCTCCCAATTAGGTTTGG

L 667-11-2 CTCACCTGCCGAAGCTGCCAATCTCAA-----CTTTCTCCCTGGCGATCCTTTCTCCCAATTAGGTTTGG

L 667-11-3 CTCACCTGCCGAAGCTGCCAATCTCAA-----CTTTCTCCCTGGCGATCCTTTCTCCCAATTAGGTTTGG

L 667-12-1 CTCACCTGCCGAAGCTGCCAATCTCAA-----CTTTCTCCCTGGCGATCCTTTCTCCCAATTAGGTTTGG

L 667-12-2 CTCACCTGCCGAAGCTGCCAATCTCAA-----CTTTCTCCCTGGCGATCCTTTCTCCCAATTAGGTTTGG

L 667-12-3 CTCACCTGCCGAAGCTGCCAATCTCAA-----CTTTCTCCCTGGCGATCCTTTCTCCCAATTAGGTTTGG

L 667-12-5 CTCACCTGCCGAAGCTGCCAATCTCAAA-----CTTTCTCCCTGGCGATCCTTTCTCCCAATTAGGTTTGG

Wild type 3' GACATTGAGGATCTAAATGGAAGGTAAGGACTGAGAATCCTTIGCTTTCTCCCTGGCGATCCTTTCTCCCAATTAGGTTTGG

**Fig. 3.**

**NGNA STD**

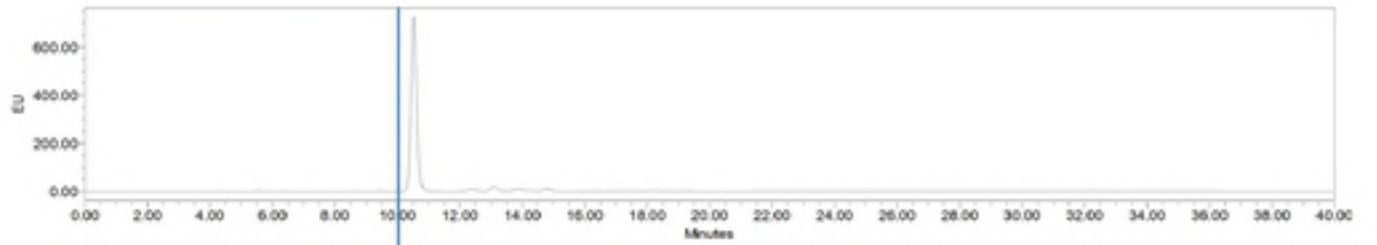

**NANA STD**

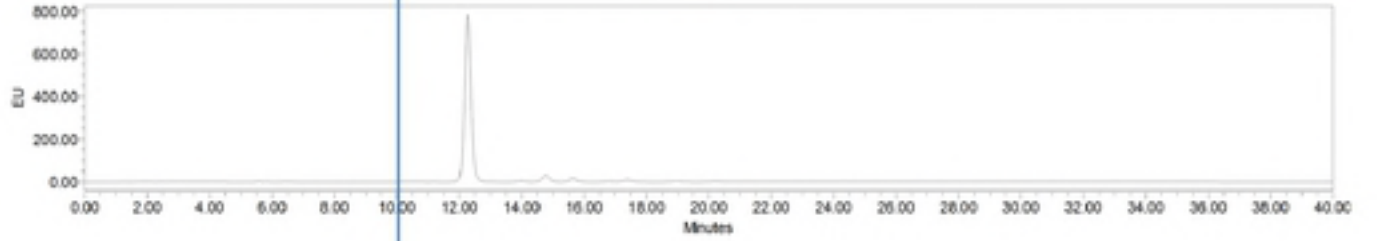

**Wild type/L667-01**

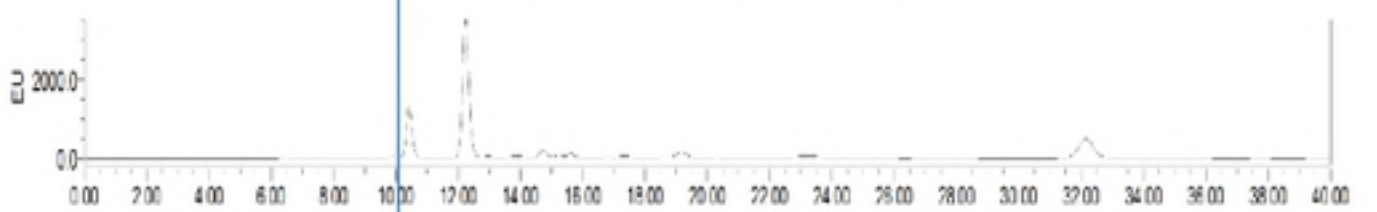

**CMAH KO pigs L667-02**

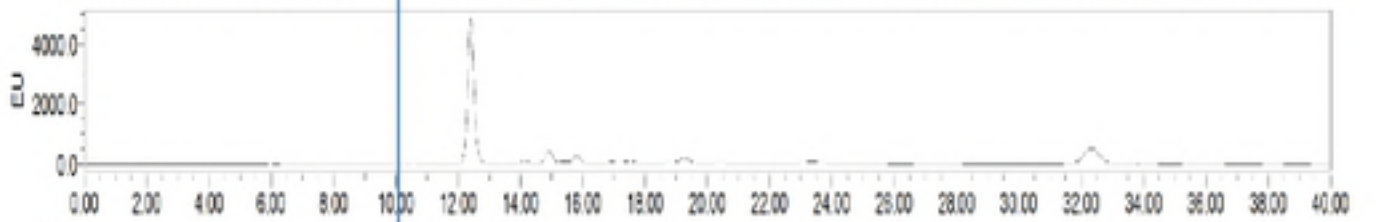

**L667-10**

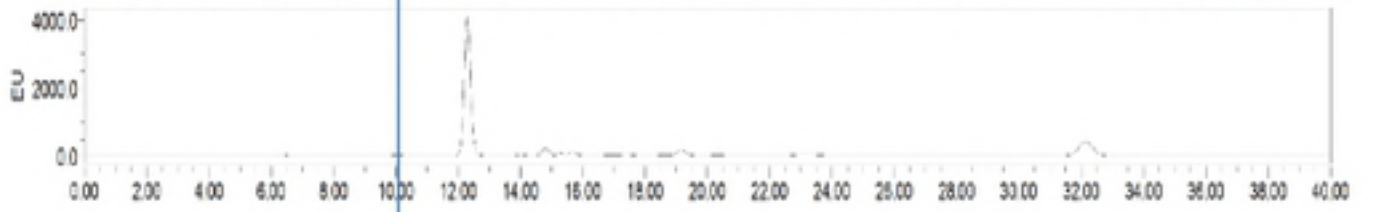

**L667-11**

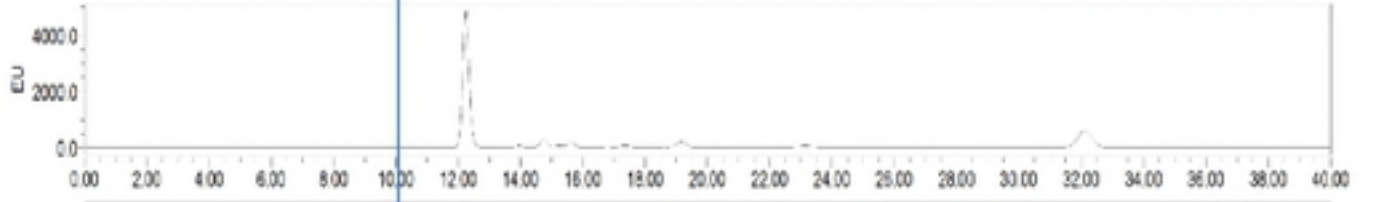

**L667-12**

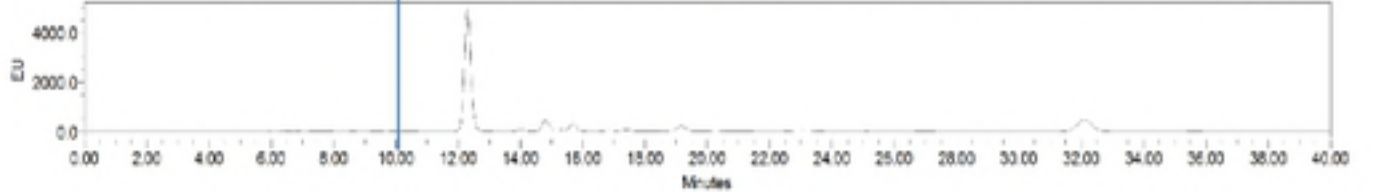

**Fig. 4A.**

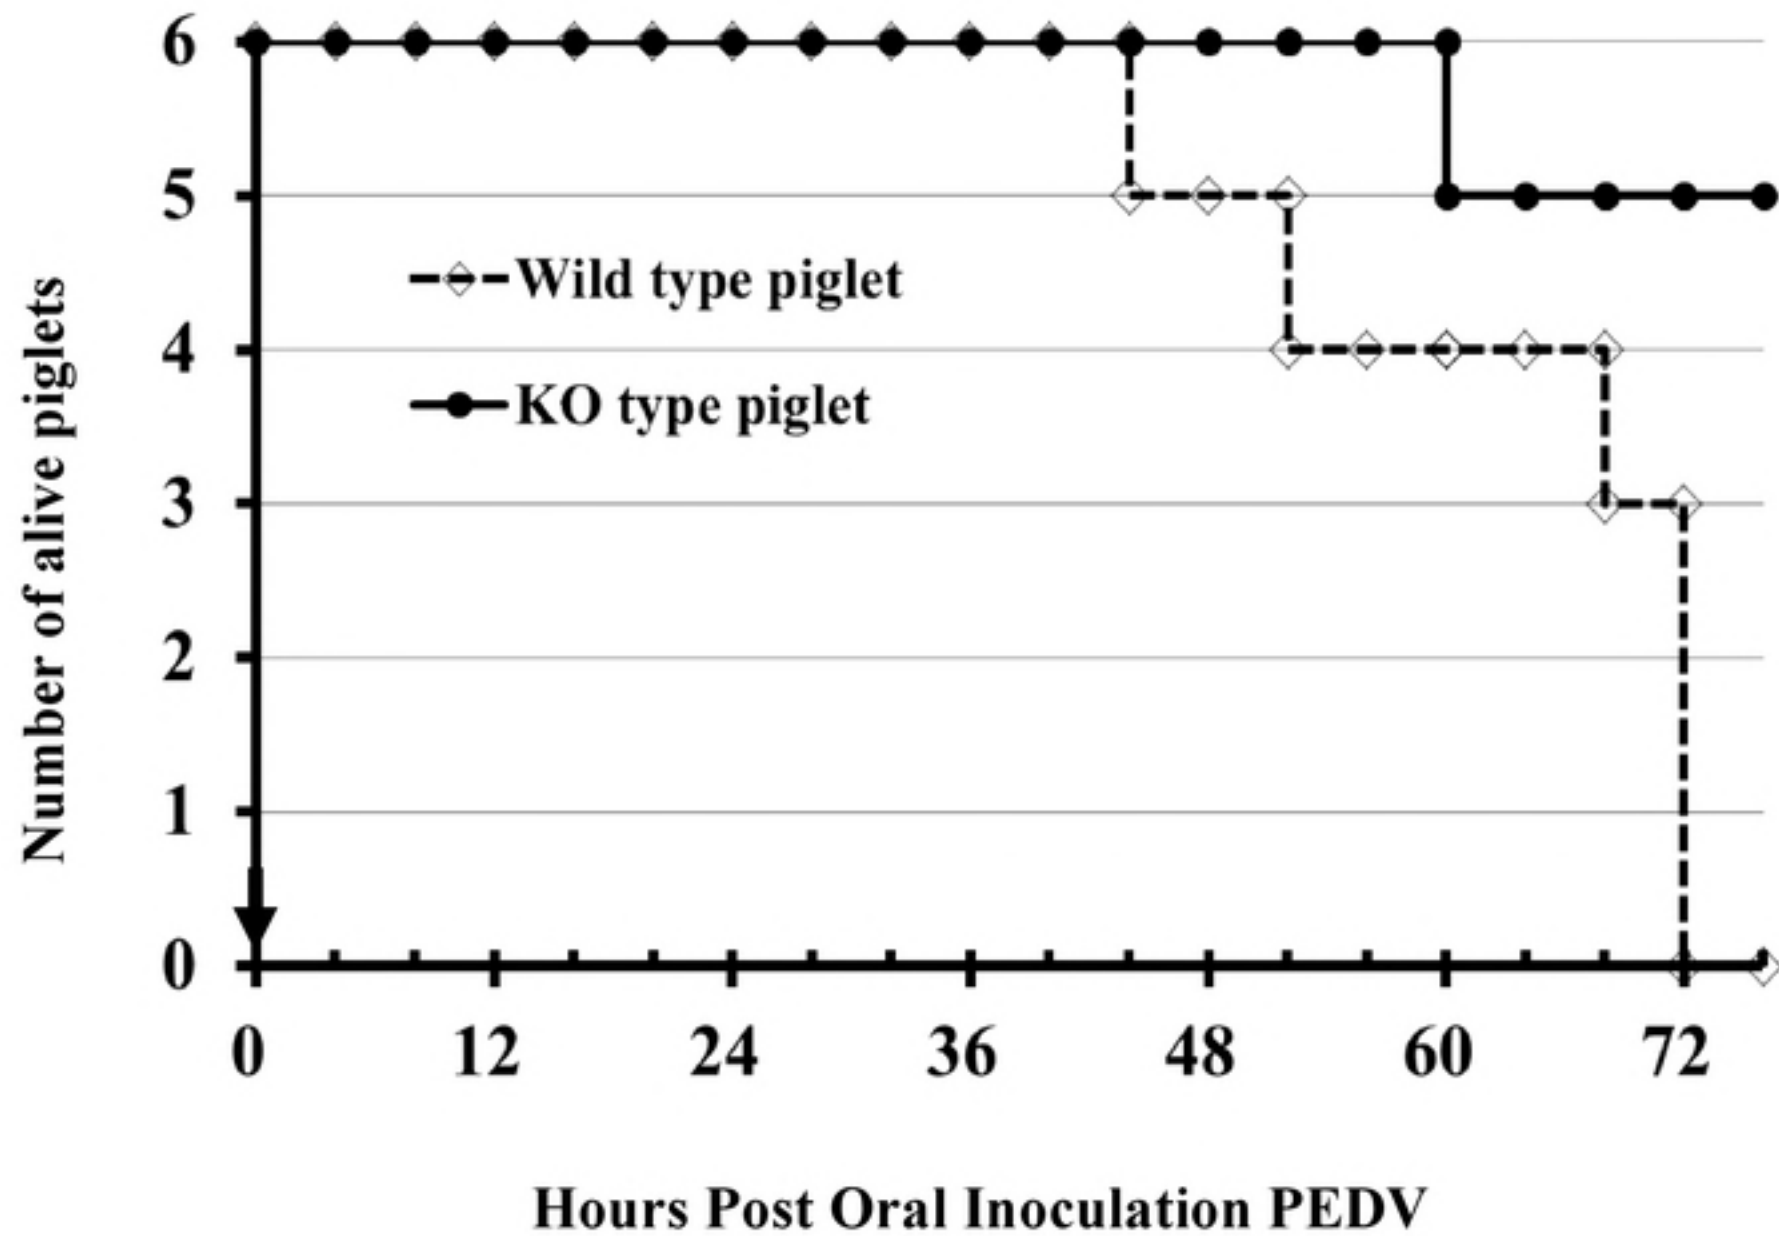

Fig. 5. A

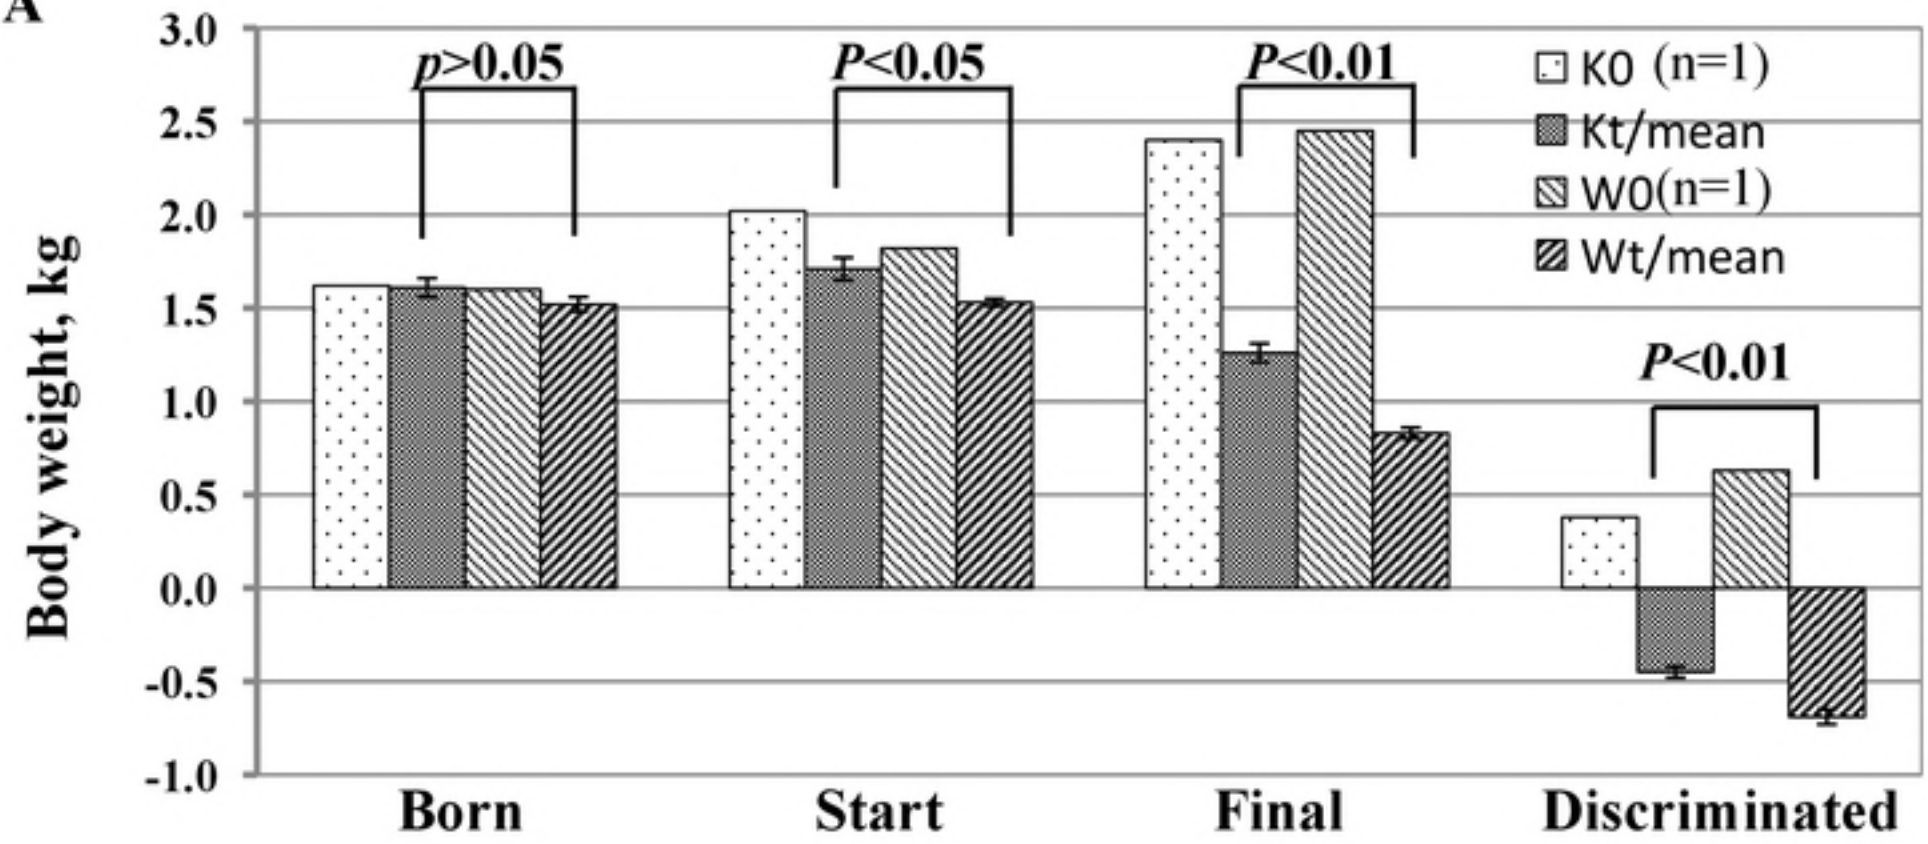

B

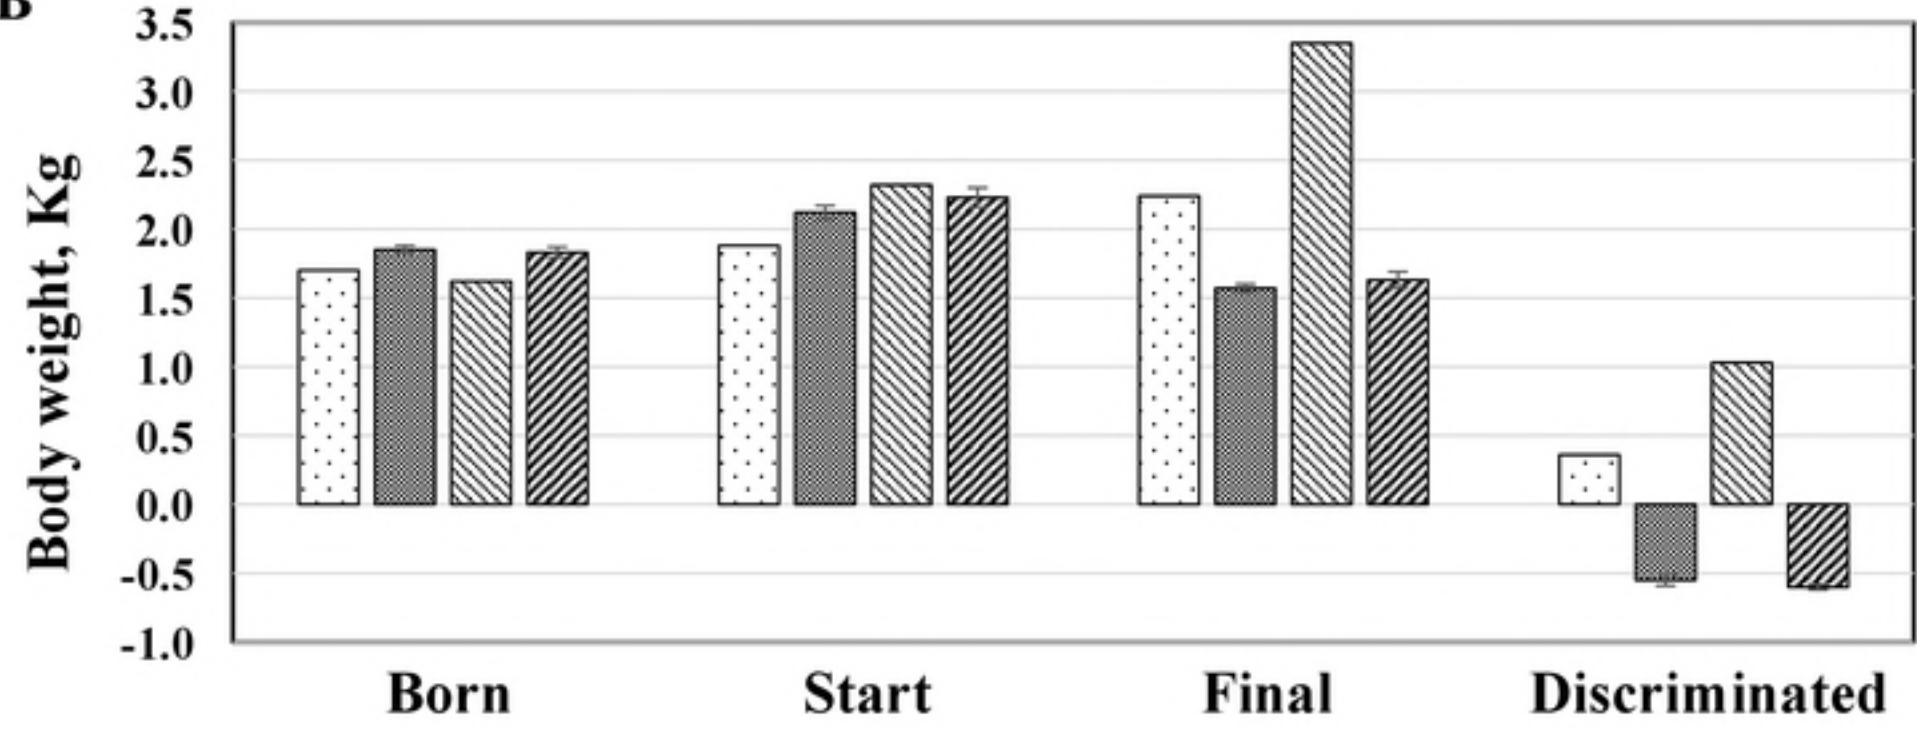



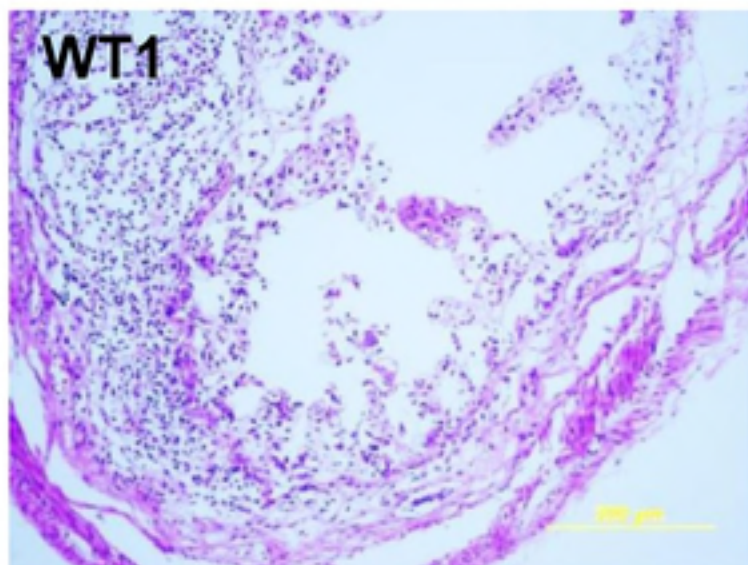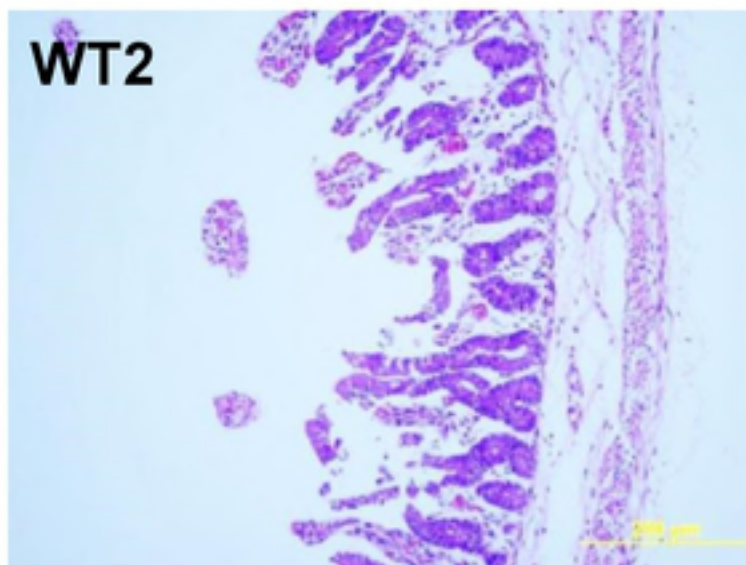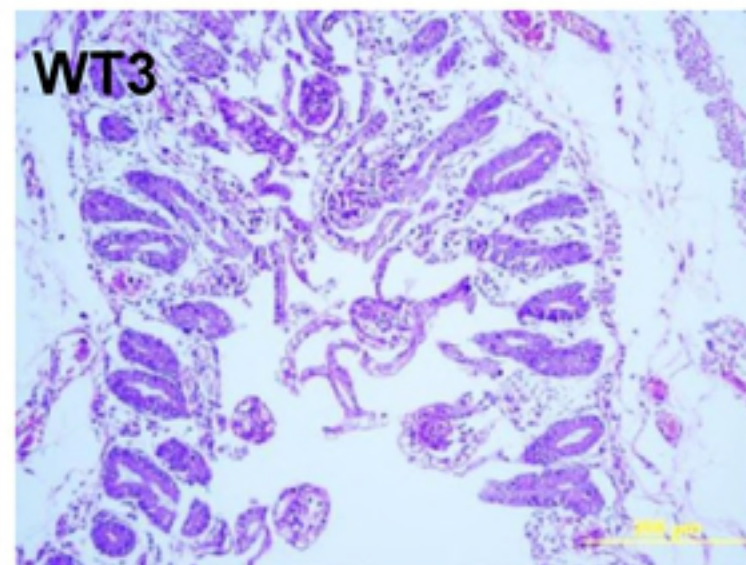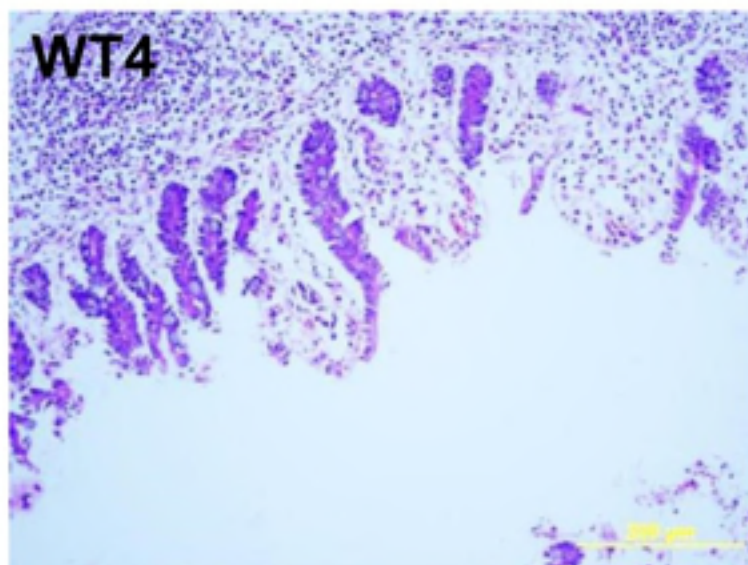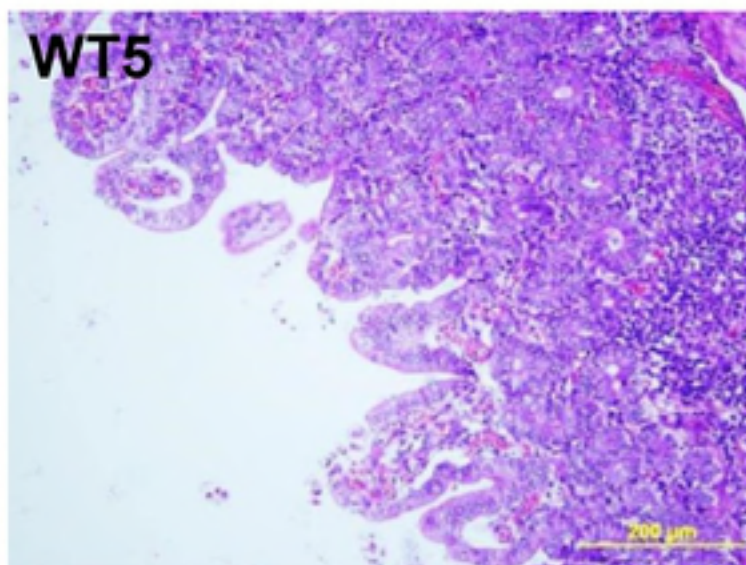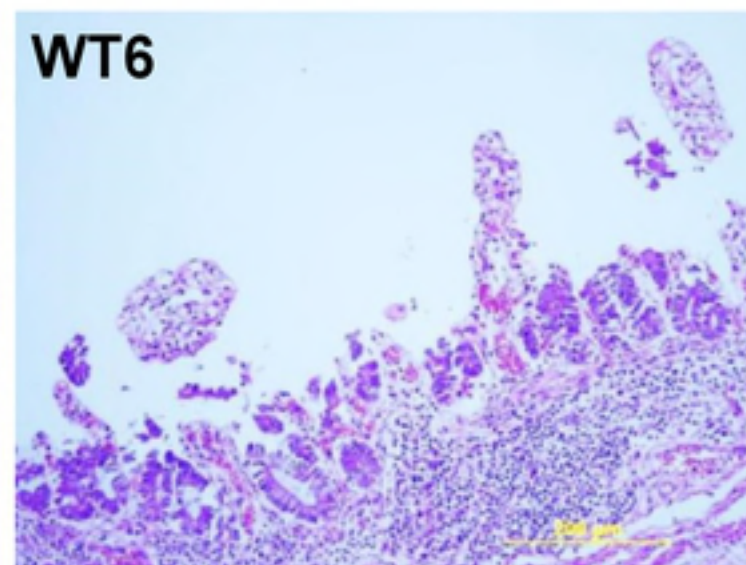

Fig. 6A-1.



**Fig. 7.**

**A. Middle jejunum of WT3**

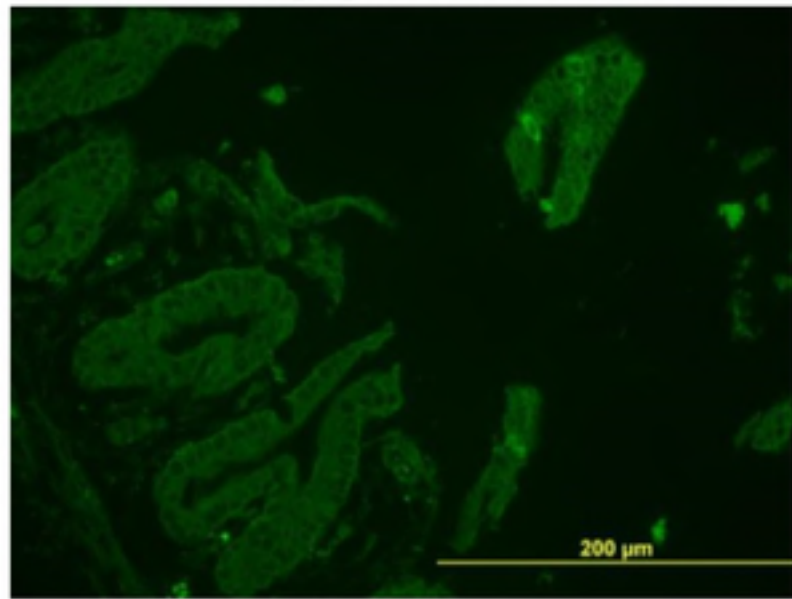

**B. Middle jejunum of KO3**

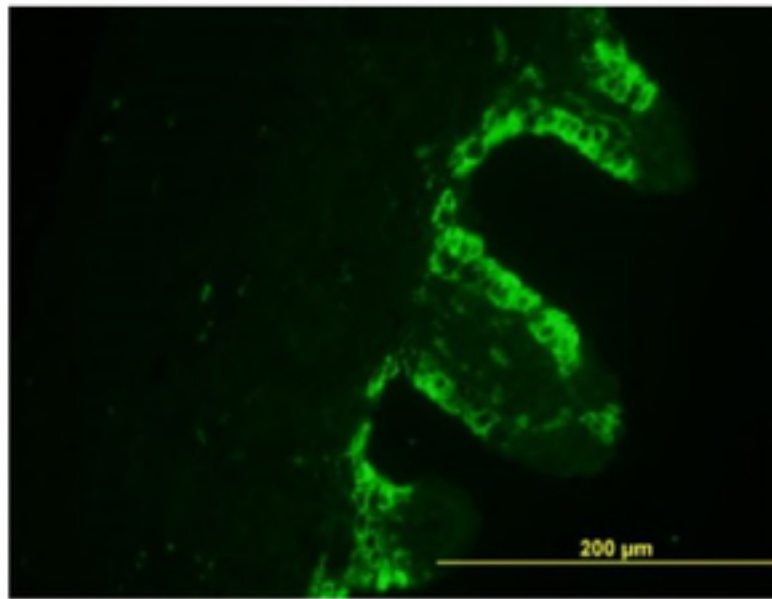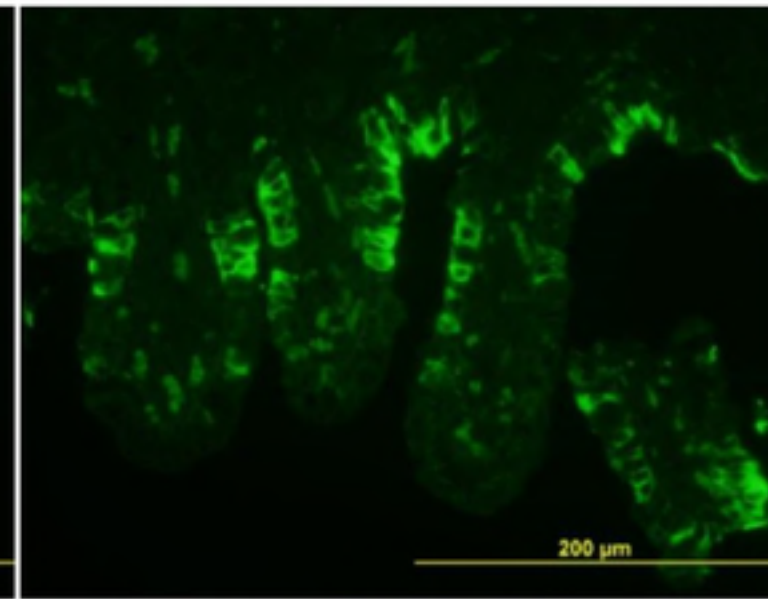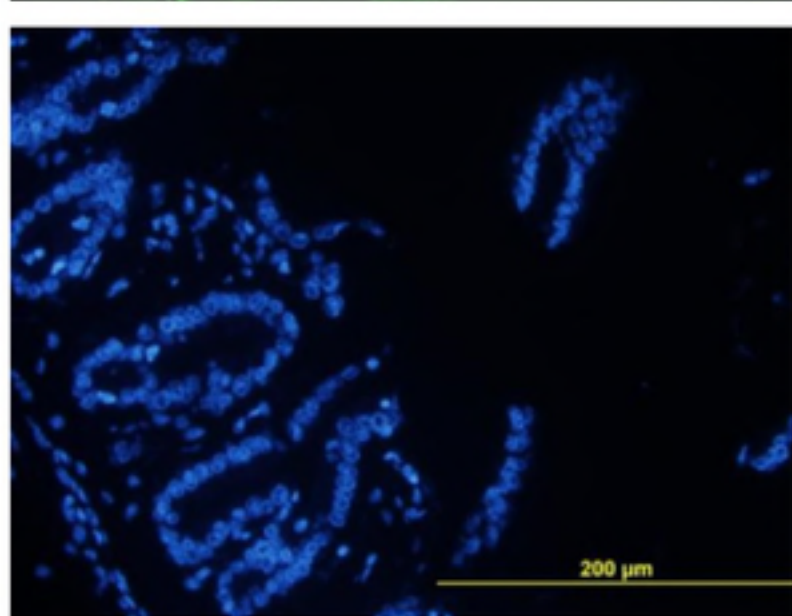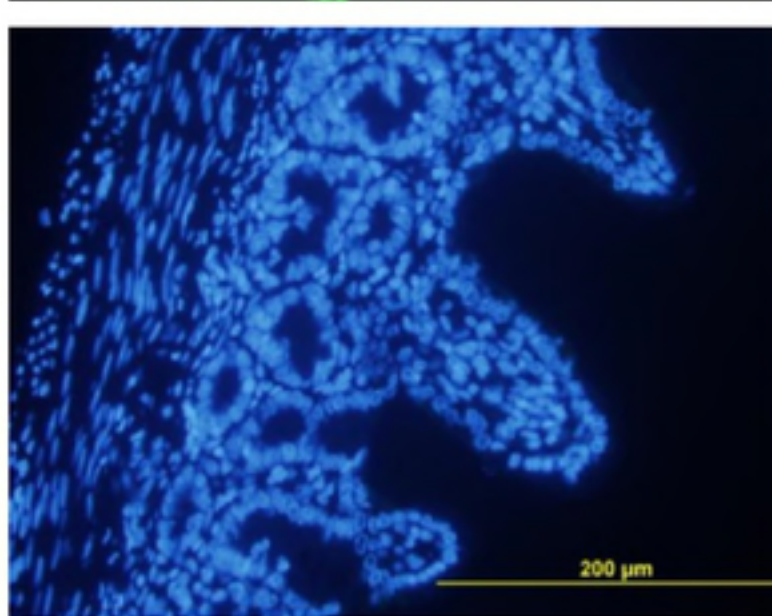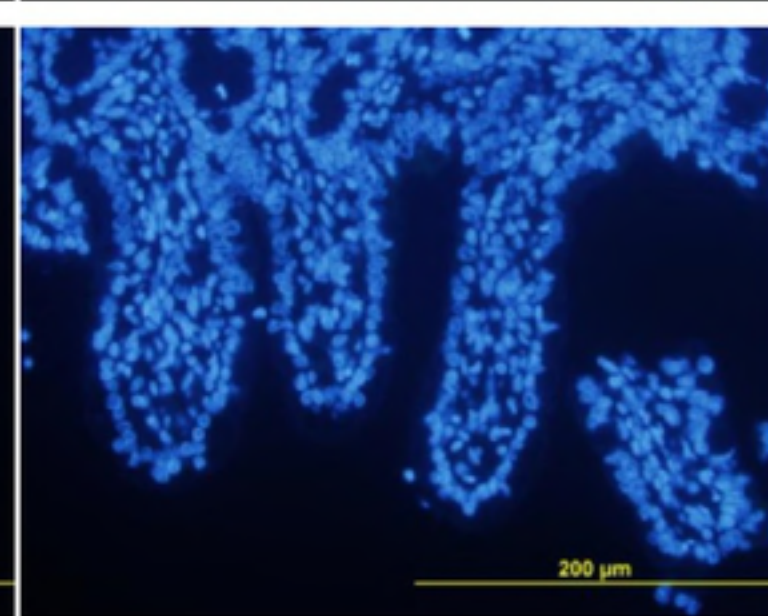



**Fig. 8.****A.**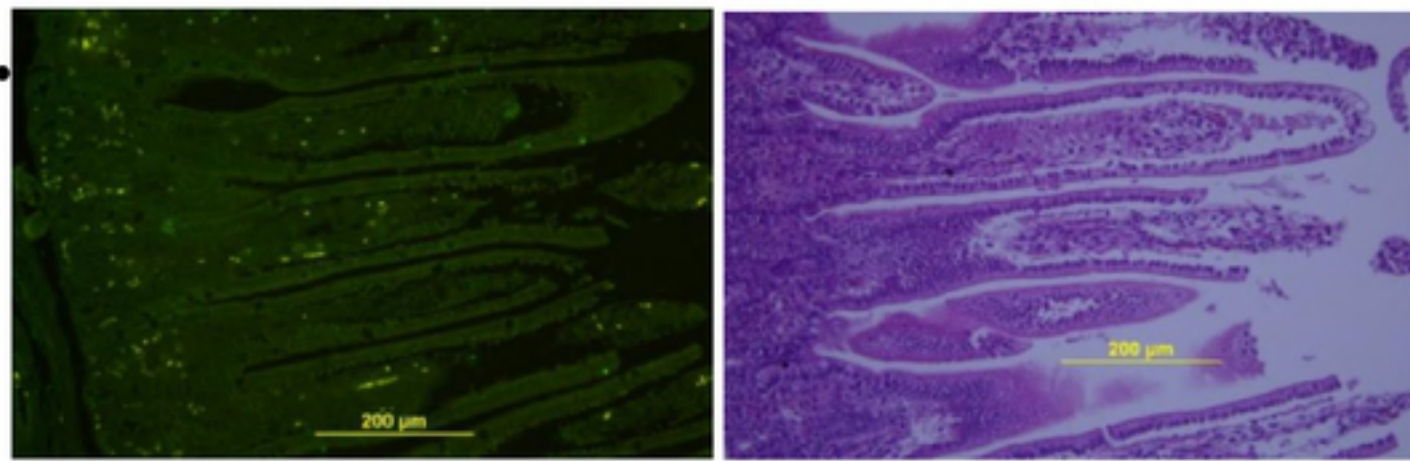**Ground state  
(G0) /K0 or Wt0****B.****G1 (IF<sup>+</sup><25%)****G2 (IF<sup>+</sup>25-50%)****G3 (IF<sup>+</sup>51-75%)****G4 (IF<sup>+</sup>>75%)****G5 (Necrosis)**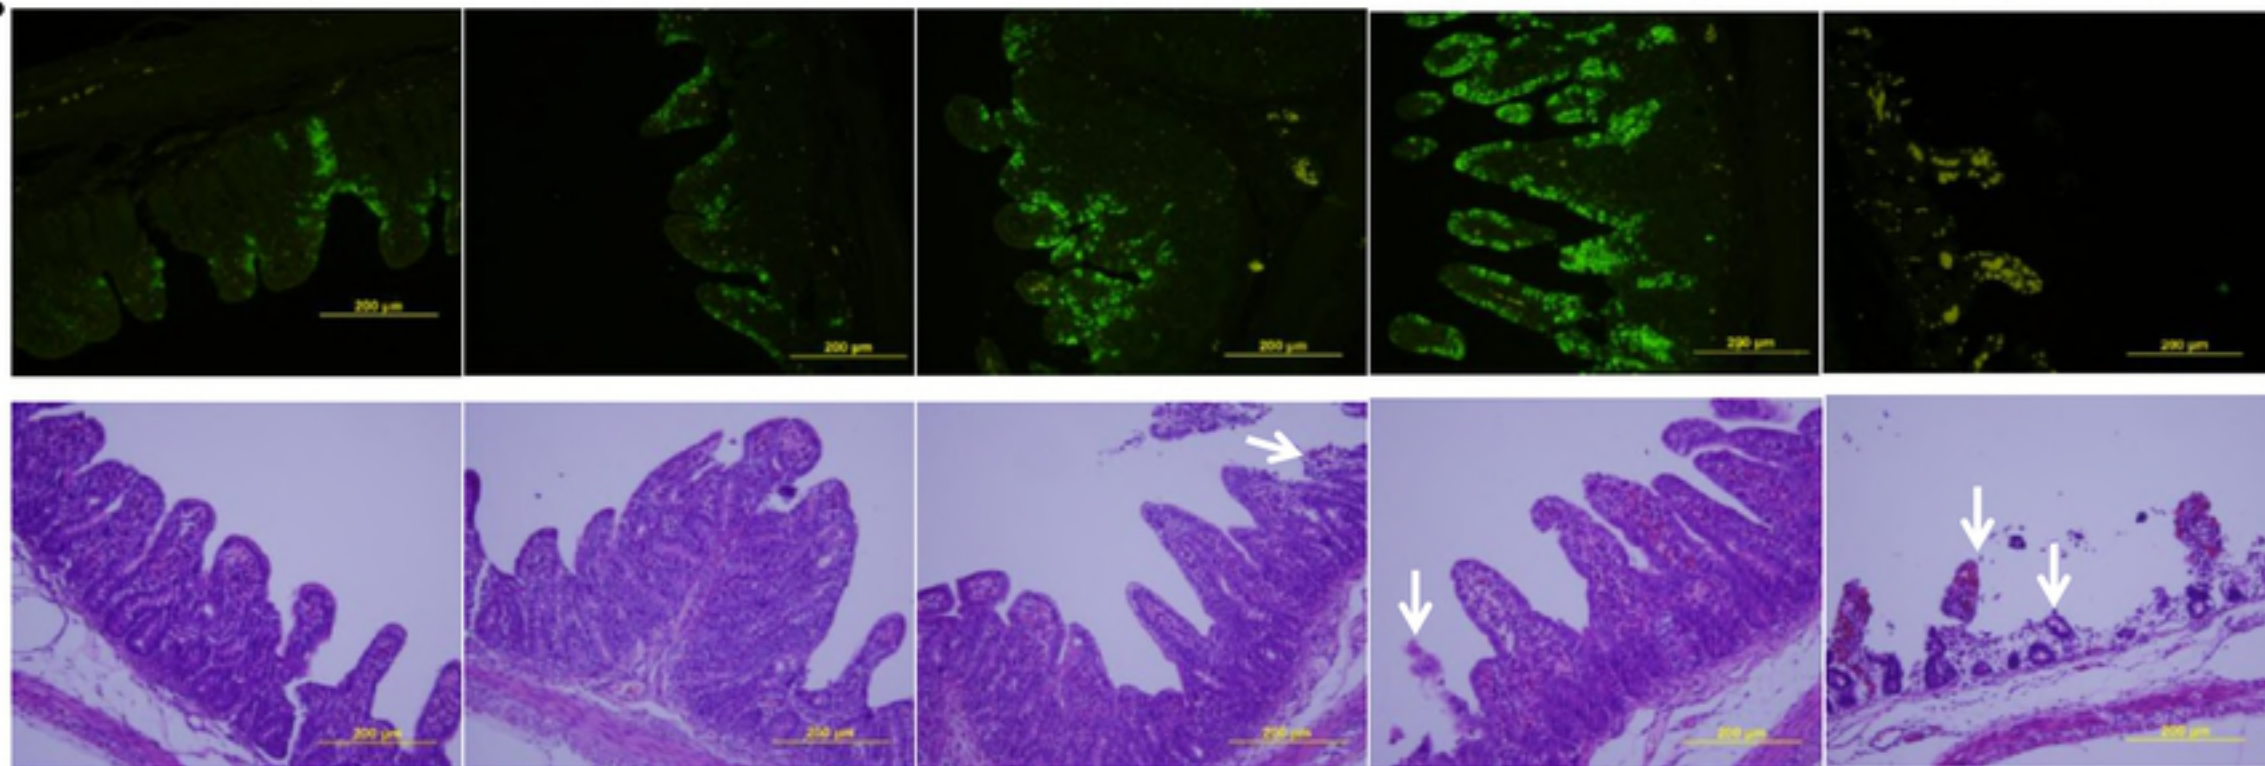**C.**

| <b>Lesion Score</b> | <b>G1</b> | <b>G2</b> | <b>G3</b> | <b>G4</b>    | <b>G5</b> |
|---------------------|-----------|-----------|-----------|--------------|-----------|
| IF positive, %      | <25       | 25-50     | 51-75     | >75/Necrosis | Necrosis  |
| Villous atrophy     | 0         | Mild      | Mild      | Moderate     | Severe    |
